# Supplementary material for: Copper-catalyzed multicomponent cascade synthesis of polyfunctionalized β-ketone sulfones
Source: Royal Society of Chemistry journal article supplement (doi:10.1039/d3qo00683b), 2023-01-01

# Supporting Information

## Copper-catalyzed multicomponent cascade synthesis of polyfunctionalization $\beta$ -ketone sulfones

Chun-Mei Luo,<sup>a</sup> Ling-Tao Wang,<sup>a</sup> Yong-Bin Sun,<sup>a</sup> Nan-Nan Dai,<sup>a</sup> Jiao-Zhe Li,<sup>a</sup>  
Jianfeng Zhang,<sup>\*a</sup> Jin-Yang Chen,<sup>b</sup> Wen-Ting Wei,<sup>\*a</sup> and Guo-Ping Ge<sup>\*a</sup>

<sup>a</sup>School of Materials Science and Chemical Engineering, Ningbo University, Ningbo, Zhejiang,  
315211, China.

<sup>b</sup>College of Chemistry and Chemical Engineering, Yangtze Normal University, Chongqing, 408000, China.

E-mail: geguoping@nbu.edu.cn; weiwenting@nbu.edu.cn; zhangjianfeng1@nbu.edu.cn

### List of Contents

|                                            |               |
|--------------------------------------------|---------------|
| <b>(A) General information</b>             | <b>S2</b>     |
| <b>(B) Typical experimental procedures</b> | <b>S2-4</b>   |
| <b>(C) Optimization</b>                    | <b>S4</b>     |
| <b>(D) Sensitivity Assessments</b>         | <b>S4-5</b>   |
| <b>(E) Analytical data</b>                 | <b>S5-16</b>  |
| <b>(F) References</b>                      | <b>S16-18</b> |
| <b>(G) Spectra</b>                         | <b>S19-48</b> |

## (A) General information

All chemicals were acquired from commercial sources and were employed as received unless otherwise mentioned. The reaction was monitored by TLC with silica gel plates, and the visualization was displayed under UV light (254 nm).  $^1\text{H}$  NMR,  $^{13}\text{C}$  NMR and  $^{19}\text{F}$  NMR spectra were recorded on a Bruker 400 (400, 101, and 376 MHz) or 500 (500, 126, and 471 MHz) advance spectrometer at room temperature in  $\text{CDCl}_3$  (solvent signals,  $\delta$  7.26 and 77.0 ppm) or  $\text{DMSO-d}_6$  (solvent signals,  $\delta$  3.35 and 39.5 ppm) using TMS as internal standard. HRMS spectra were measured on an electrospray ionization quadrupole time-of-flight (ESI-Q-TOF) mass spectrometer.

## (B) Typical experimental procedures

### (1) General procedure for the synthesis of vinyl azides.<sup>1</sup>

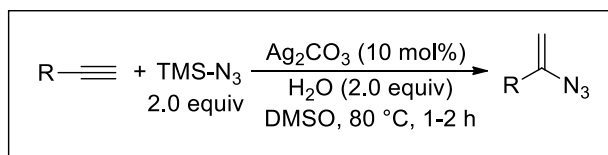

To a round bottom flask were added terminal alkyne (2.0 mmol),  $\text{TMSN}_3$  (2.0 equiv),  $\text{Ag}_2\text{CO}_3$  (10 mol%) and  $\text{H}_2\text{O}$  (2.0 equiv) in  $\text{DMSO}$  (5.0 mL) at  $80^\circ\text{C}$ . And then the mixture stirred for 1-2 h until terminal alkyne consumed as indicated by TLC. The organic layer was washed with brine, dried over  $\text{MgSO}_4$  and evaporation of the solvent. The mixture was purified by column chromatography over silica gel to afford vinyl azides (petroleum ether).

### (2) General procedure for the synthesis of oxime esters.<sup>2</sup>

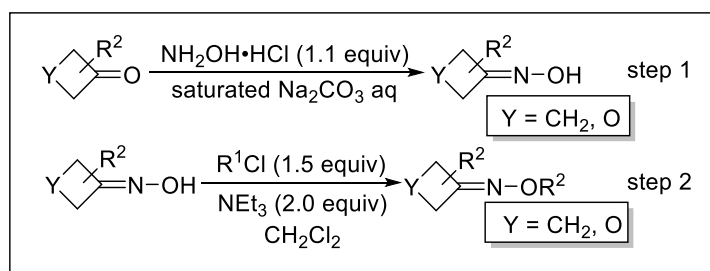

**Step 1:** The ketone (2.0 mmol) and hydroxylamine hydrochloride (2.2 mmol, 1.1 equiv) were placed in a round bottom flask equipped with stirrer. The pH of the solution was held at 7-8 by adding saturated aq. sodium carbonate (5.0 mL). The resulting solution was stirred at 40 °C. After extraction with ether, the solution was dried over Na<sub>2</sub>SO<sub>4</sub> and evaporated to provide crude products which were used in the next step without further purification.

**Step 2:** To a mixture of cyclobutanone oxime (1.0 equiv), triethylamine (2.0 equiv) and DCM (5.0 mL) in a round bottom flask was slowly added R<sup>1</sup>Cl (1.5 equiv) at 0 °C and then the mixture was stirred at room temperature for 7 h. The organic layer was washed with water and dried over Na<sub>2</sub>SO<sub>4</sub>. The solution was concentrated under reduced pressure, and the mixture was purified by flash column chromatography over silica gel to give oxime esters (petroleum ether/ethyl acetate = 5:1~3:1).

### (3) General procedure for the synthesis of compounds 4.

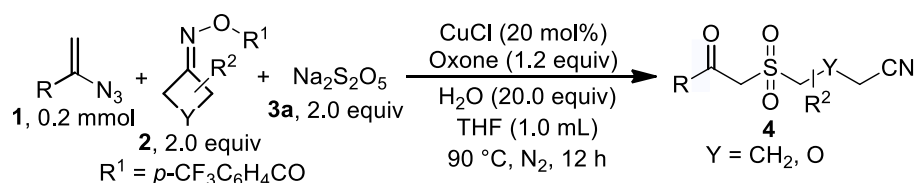

Vinyl azides (**1**, 0.2 mmol), oxime esters (**2**, 2.0 equiv), sodium pyrosulfite (**3a**, 2.0 equiv), CuCl (20 mol%), Oxone (1.2 equiv), H<sub>2</sub>O (20.0 equiv) and THF (1.0 mL) were sequentially added to a Schlenk tube (10 mL), and the reaction mixture was

heated with stirring in N<sub>2</sub> at 90 °C for 12 h until complete consumption of starting material was monitored by TLC and/or GC-MS analysis. After the reaction was finished, the mixture was extracted three times with EtOAc, washed in an aqueous solution saturated with sodium bicarbonate, dried over Na<sub>2</sub>SO<sub>4</sub> and evaporated under reduced pressure. The resulting mixture purified by flash column chromatography (petroleum ether/ethyl acetate = 2:1~1:1) to give the desired products **4**.

### (C) Optimization

**Table S1. Evaluation the amount of catalyst and oxidant**

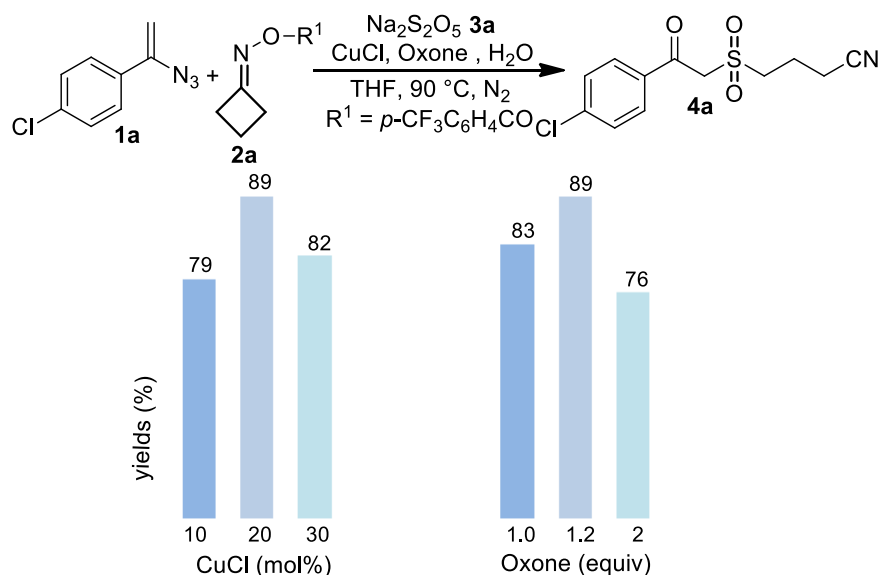

Reactions conditions: **1a** (0.2 mmol), **2a** (2.0 equiv), **3a** (2.0 equiv), CuCl, Oxone and H<sub>2</sub>O (20.0 equiv) in THF (1.0 mL) under N<sub>2</sub> at 90 °C for 12

### (D) Sensitivity Assessments

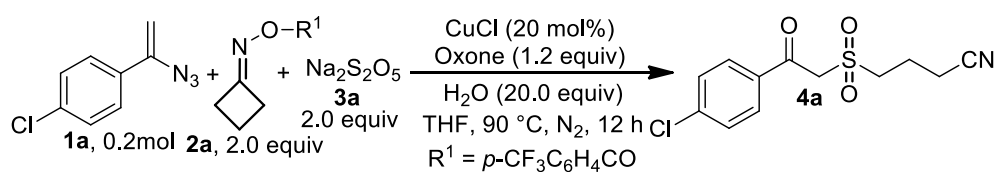

Standard Conditions:  $n = 0.2 \text{ mmol}$ ,  $c = 0.2 \text{ M}$ ,  $V = 1.0 \text{ mL}$ , in degassed,  $T = 90 \text{ } ^\circ\text{C}$ .

Stock Solution:  $n = 2.0$  mmol,  $c = 0.222$  M,  $V = 9.0$  mL, **1a**: 358.1 mg, **2a**: 1028.3 mg, **3a**: 760.4 mg, CuCl: 39.6 mg, Oxone: 1475.4 mg.

Stock Solution 'big scale':  $n = 6.02$  mmol,  $c = 0.2$  M,  $V = 30.1$  mL, **1a**: 1077.7 mg, **2a**: 3095.1 mg, **3a**: 2288.9 mg, CuCl: 119.2 mg, Oxone: 4441.0 mg, H<sub>2</sub>O: 2167.2  $\mu$ L.

The method is on account of parameter variations in positive and negative direction of reference standard reaction conditions. Only one parameter is consciously changed in each experiment, while maintaining the others at the standard level. The yield of the product is determined by GC-FID analysis. The calibration of the product of the reaction was carried out using the single point calibration technique for gas chromatography (GC) analysis. The preparation of the experiments and the results of the sensitivity assessment are displayed in Tables S2 and S3.

**Table S2. Preparation of sensitivity assessment of reaction.**

| Number | Experiment           | Preparation                                                               |
|--------|----------------------|---------------------------------------------------------------------------|
| 1      | High $c$             | 0.8 mL stock sol. +72 $\mu$ L H <sub>2</sub> O                            |
| 2      | Low $c$              | 0.8 mL stock sol. + 0.4 mL THF+72 $\mu$ L H <sub>2</sub> O                |
| 3      | Low H <sub>2</sub> O | 0.8 mL stock sol. + 0.2 mL THF                                            |
| 4      | High O <sub>2</sub>  | 0.8 mL stock sol. + 0.2 mL THF +72 $\mu$ L H <sub>2</sub> O + air         |
| 5      | Low O <sub>2</sub>   | 0.8 mL stock sol. + 0.2 mL THF +72 $\mu$ L H <sub>2</sub> O + degassed    |
| 6      | Low $T$              | 0.8 mL stock sol. + 0.2 mL THF +72 $\mu$ L H <sub>2</sub> O, $T = 80$ °C  |
| 7      | High $T$             | 0.8 mL stock sol. + 0.2 mL THF +72 $\mu$ L H <sub>2</sub> O, $T = 100$ °C |
| 8      | Control              | 0.8 mL stock sol. + 0.2 mL THF +72 $\mu$ L H <sub>2</sub> O               |
| 9      | Big Scale            | 40.0 mL stock solution 'big scale'                                        |

**Table S3. Results of sensitivity assessment of reaction.**

| Number | Experiment           | Yield / % | Deviation / % |
|--------|----------------------|-----------|---------------|
| 1      | High $c$             | 80        | -10           |
| 2      | Low $c$              | 83        | -7            |
| 3      | Low H <sub>2</sub> O | 56        | -37           |
| 4      | High O <sub>2</sub>  | 35        | -61           |
| 5      | Low O <sub>2</sub>   | 89        | 0             |
| 6      | High $T$             | 84        | -6            |
| 7      | Low $T$              | 76        | -15           |
| 8      | Control              | 89        | 0             |
| 9      | Big Scale            | 68        | -23           |

**(E) Analytical data**

**4-((2-(4-Chlorophenyl)-2-oxoethyl)sulfonyl)butanenitrile**

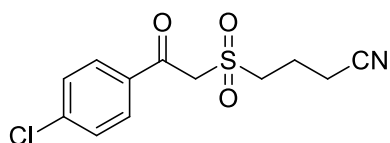

**4a**).<sup>3</sup> The product was purified by silica gel column chromatography with petroleum ether/ethyl acetate (2:1, v/v). 0.0507 g, 89% yield; <sup>1</sup>H NMR (400 MHz, CDCl<sub>3</sub>) δ: 7.92 (d, *J* = 8.4 Hz, 2H), 7.48 (d, *J* = 8.4 Hz, 2H), 4.61 (s, 2H), 3.42 (t, *J* = 7.2 Hz, 2H), 2.62 (t, *J* = 7.2 Hz, 2H), 2.30-2.23 (m, 2H); <sup>13</sup>C NMR (101 MHz, CDCl<sub>3</sub>) δ: 187.9, 141.6, 133.7, 130.6, 129.4, 118.1, 59.9, 51.8, 18.2, 16.2.

**4-((2-(4-Chlorophenyl)-2-oxoethyl)sulfonyl)-3-phenylbutanenitrile**

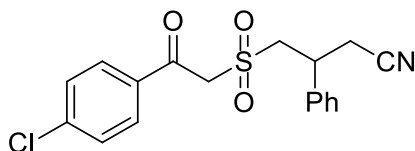

**4b**). The product was purified by silica gel column chromatography with petroleum ether/ethyl acetate (2:1, v/v). Yellow oil (0.0585 g, 81% yield); <sup>1</sup>H NMR (400 MHz, CDCl<sub>3</sub>) δ: 7.80 (d, *J* = 8.4 Hz, 2H), 7.45 (d, *J* = 8.4 Hz, 2H), 7.38-7.30 (m, 5H), 4.44 (d, *J* = 15.2 Hz, 1H), 4.07 (d, *J* = 15.2 Hz, 1H), 3.93-3.88 (m, 1H), 3.80-3.73 (m, 1H), 3.68-3.62 (m, 1H), 2.92 (d, *J* = 6.4 Hz, 2H); <sup>13</sup>C NMR (101 MHz, CDCl<sub>3</sub>) δ: 187.7, 141.5, 138.2, 133.7, 130.3, 129.4, 129.3, 128.7, 127.4, 117.1, 60.3, 57.2, 36.4, 24.4; HRMS *m/z* (ESI) calcd for C<sub>18</sub>H<sub>17</sub>ClNO<sub>3</sub>S ([M+H]<sup>+</sup>) 362.0612 found 362.0617.

**3-(Benzyloxy)-4-((2-(4-chlorophenyl)-2-oxoethyl)sulfonyl)butanenitrile**

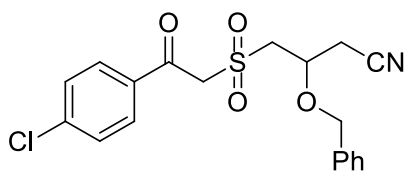

**4c**). The product was purified by silica gel column chromatography with petroleum ether/ethyl acetate (2:1, v/v). Brown solid (0.0594 g, 76% yield); <sup>1</sup>H NMR (400 MHz, CDCl<sub>3</sub>) δ: 7.74 (d, *J* = 8.4 Hz, 2H), 7.43 (d, *J* = 8.4 Hz, 2H), 7.38-7.30 (m, 5H), 4.44 (d, *J* = 15.2 Hz, 1H), 4.07 (d, *J* = 15.2 Hz, 1H), 3.93-3.88 (m, 1H), 3.80-3.73 (m, 1H), 3.68-3.62 (m, 1H), 2.92 (d, *J* = 6.4 Hz, 2H); <sup>13</sup>C NMR (101 MHz, CDCl<sub>3</sub>) δ: 187.7, 141.5, 138.2, 133.7, 130.3, 129.4, 129.3, 128.7, 127.4, 117.1, 60.3, 57.2, 36.4, 24.4; HRMS *m/z* (ESI) calcd for C<sub>23</sub>H<sub>21</sub>ClNO<sub>3</sub>S ([M+H]<sup>+</sup>) 437.0762 found 437.0762.

z, 2H), 7.34-7.31 (m, 5H), 4.75 (d,  $J = 10.8$  Hz, 1H), 4.64 (d,  $J = 10.8$  Hz, 1H), 4.58 (s, 2H), 4.43-4.37 (m, 1H), 3.95-3.89 (m, 1H), 3.44-3.39 (m, 1H), 2.86-2.80 (m, 1H), 2.78-2.72 (m, 1H);  $^{13}\text{C}$  NMR (101 MHz,  $\text{CDCl}_3$ )  $\delta$ : 187.7, 141.3, 135.8, 133.7, 130.2, 129.3, 128.7, 128.6, 128.3, 115.9, 73.0, 70.4, 61.3, 56.7, 22.7; HRMS  $m/z$  (ESI) calcd for  $\text{C}_{19}\text{H}_{19}\text{ClNO}_4\text{S}$  ( $[\text{M}+\text{H}]^+$ ) 392.0718, found 392.0716.

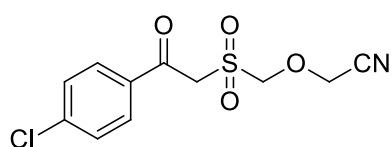

**2-(((2-(4-Chlorophenyl)-2-oxoethyl)sulfonyl)methoxy)acetonitrile (4d).** The product was purified

by silica gel column chromatography with petroleum ether/ethyl acetate (2:1, v/v). White solid (0.0453 g, 79% yield);  $^1\text{H}$  NMR (400 MHz,  $\text{CDCl}_3$ )  $\delta$ : 7.91 (d,  $J = 8.4$  Hz, 2H), 7.51 (d,  $J = 8.0$  Hz, 2H), 4.83 (s, 2H), 4.70 (s, 2H), 4.66 (s, 2H);  $^{13}\text{C}$  NMR (101 MHz,  $\text{CDCl}_3$ )  $\delta$ : 187.3, 141.7, 133.7, 130.4, 129.5, 114.3, 82.3, 57.4, 56.6; HRMS  $m/z$  (ESI) calcd for  $\text{C}_{11}\text{H}_{11}\text{ClNO}_4\text{S}$  ( $[\text{M}+\text{H}]^+$ ) 288.0092, found 288.0098.

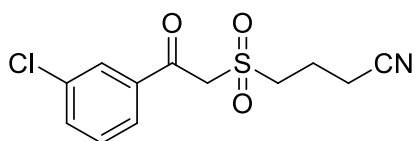

**4-(((2-(3-Chlorophenyl)-2-oxoethyl)sulfonyl)butanenitrile (4e).**<sup>3</sup> The product was purified by

silica gel column chromatography with petroleum ether/ethyl acetate (2:1, v/v). 0.0467 g, 82% yield;  $^1\text{H}$  NMR (400 MHz,  $\text{CDCl}_3$ )  $\delta$ : 7.94 (s, 1H), 7.85 (d,  $J = 8.0$  Hz 1H), 7.61 (d,  $J = 8.0$  Hz 1H), 7.46 (t,  $J = 8.0$  Hz, 1H), 4.63 (s, 2H), 3.43 (t,  $J = 7.6$  Hz, 2H), 2.62 (t,  $J = 7.2$  Hz, 2H), 2.30-2.23 (m, 2H);  $^{13}\text{C}$  NMR (101 MHz,  $\text{CDCl}_3$ )  $\delta$ : 188.0, 136.9, 135.3, 134.6, 130.3, 128.9, 127.4, 118.2, 59.9, 51.8, 18.1, 16.2.

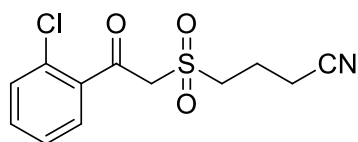

**4-((2-(2-Chlorophenyl)-2-oxoethyl)sulfonyl)butanenitrile (4f).**<sup>3</sup> The product was purified by silica gel

column chromatography with petroleum ether/ethyl acetate (2:1, v/v). 0.0450 g, 79% yield; <sup>1</sup>H NMR (500 MHz, CDCl<sub>3</sub>) δ: 7.67-7.65 (m, 1H), 7.52-7.46 (m, 2H), 7.41 (t, *J* = 7.5 Hz 1H), 4.70 (s, 2H), 3.48 (t, *J* = 7.5 Hz, 2H), 2.65 (t, *J* = 7.5 Hz, 2H), 2.32-2.26 (m, 2H); <sup>13</sup>C NMR (126 MHz, CDCl<sub>3</sub>) δ: 191.1, 136.9, 133.6, 131.6, 130.8, 130.5, 127.4, 118.1, 63.1, 52.2, 18.2, 16.2.

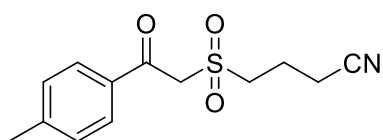

**4-((2-oxo-2-(*p*-Tolyl)ethyl)sulfonyl)butanenitrile**

**(4g).**<sup>3</sup> The product was purified by silica gel column chromatography with petroleum ether/ethyl acetate

(2:1, v/v). 0.0414 g, 78% yield; <sup>1</sup>H NMR (400 MHz, CDCl<sub>3</sub>) δ: 7.88 (d, *J* = 8.0 Hz, 2H), 7.31 (d, *J* = 8.0 Hz, 2H), 4.59 (s, 2H), 3.42 (t, *J* = 7.6 Hz, 2H), 2.61 (t, *J* = 7.2 Hz, 2H), 2.43 (s, 3H), 2.30-2.23 (m, 2H); <sup>13</sup>C NMR (101 MHz, CDCl<sub>3</sub>) δ: 188.4, 146.2, 133.0, 129.7, 129.3, 118.1, 59.9, 51.7, 21.8, 18.2, 16.2.

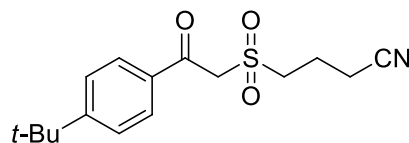

**4-((2-(4-(*tert*-Butyl)phenyl)-2-oxoethyl)sulfonyl)butanenitrile (4h).** The product was purified by

silica gel column chromatography with petroleum ether/ethyl acetate (2:1, v/v). Yellow solid (0.0448 g, 73% yield); <sup>1</sup>H NMR (400 MHz, CDCl<sub>3</sub>) δ: 7.73 (d, *J* = 8.0 Hz, 2H), 7.33 (d, *J* = 8.0 Hz, 2H), 4.40 (s, 2H), 3.24 (t, *J* = 7.2 Hz, 2H), 2.42 (t, *J* = 7.2 Hz, 2H), 2.12-2.05 (m, 2H), 1.14 (s, 9H); <sup>13</sup>C NMR (101 MHz, CDCl<sub>3</sub>) δ: 188.4, 159.0, 132.9, 129.3, 126.1, 118.1, 59.9, 51.7, 35.3,



30.9, 18.3, 16.3. HRMS  $m/z$  (ESI) calcd for  $C_{16}H_{22}NO_3S$  ( $[M+H]^+$ ) 308.1315, found 308.1220.

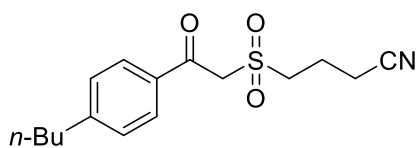

**4-((2-(4-Butylphenyl)-2-oxoethyl)sulfonyl)butanenitrile (4i).** The product was purified by silica gel column chromatography with petroleum ether/ethyl acetate (2:1, v/v). Yellow oil (0.0442 g, 72% yield);  $^1H$  NMR (500 MHz,  $CDCl_3$ )  $\delta$ : 7.91 (d,  $J = 8.5$  Hz, 2H), 7.33 (d,  $J = 8.0$  Hz, 2H), 4.59 (s, 2H), 3.44 (t,  $J = 7.5$  Hz, 2H), 2.69 (t,  $J = 8.0$  Hz, 2H), 2.63 (t,  $J = 7.5$  Hz, 2H), 2.32-2.26 (m, 2H), 1.65-1.59 (m, 2H), 1.38-1.34 (m, 2H), 0.93 (t,  $J = 7.5$  Hz, 3H);  $^{13}C$  NMR (126 MHz,  $CDCl_3$ )  $\delta$ : 188.4, 151.1, 133.2, 129.4, 129.1, 118.1, 60.0, 51.7, 35.8, 33.0, 22.3, 18.3, 16.3, 13.8; HRMS  $m/z$  (ESI) calcd for  $C_{16}H_{22}NO_3S$  ( $[M+H]^+$ ) 308.1315, found 308.1320.

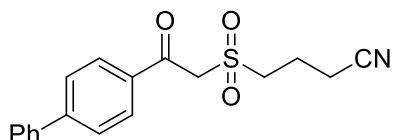

**4-((2-([1,1'-Biphenyl]-4-yl)-2-oxoethyl)sulfonyl)butanenitrile (4j).** The product was purified by silica gel column chromatography with petroleum ether/ethyl acetate (1:1, v/v). White solid (0.0412 g, 63% yield);  $^1H$  NMR (400 MHz,  $CDCl_3$ )  $\delta$ : 8.07 (d,  $J = 8.4$  Hz, 2H), 7.75 (d,  $J = 8.4$  Hz, 2H), 7.63 (d,  $J = 7.2$  Hz, 2H), 7.51-7.41 (m, 3H), 4.65 (s, 2H), 3.46 (t,  $J = 7.2$  Hz, 2H), 2.65 (t,  $J = 7.2$  Hz, 2H), 2.35-2.28 (m, 2H);  $^{13}C$  NMR (101 MHz,  $CDCl_3$ )  $\delta$ : 188.4, 147.6, 139.2, 134.1, 129.9, 129.1, 128.7, 127.6, 127.3, 118.0, 60.1, 51.7, 18.3, 16.3; HRMS  $m/z$  (ESI) calcd for  $C_{18}H_{17}NO_3SNa$  ( $[M+Na]^+$ ) 350.0821, found 350.0950.

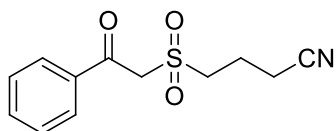

**4-((2-(4-Chlorophenyl)-2-oxoethyl)sulfonyl)butanenitrile (4k).**<sup>3</sup> The product was purified by silica gel column chromatography with petroleum ether/ethyl acetate (2:1, v/v). 0.0412 g, 8

2% yield; <sup>1</sup>H NMR (500 MHz, CDCl<sub>3</sub>) δ: 8.00 (d, *J* = 7.0 Hz, 2H), 7.67 (t, *J* = 7.5 Hz, 1H), 7.54 (t, *J* = 8.0 Hz, 2H), 4.63 (s, 2H), 3.45 (t, *J* = 7.5 Hz, 2H), 2.63 (t, *J* = 7.0 Hz, 2H), 2.32-2.26(m, 2H); <sup>13</sup>C NMR (126 MHz, CDCl<sub>3</sub>) δ: 189.0, 135.4, 134.8, 129.2, 129.0, 118.1, 59.9, 51.8, 18.2, 16.2.

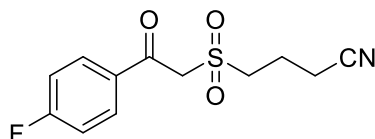

**4-((2-(4-Fluorophenyl)-2-oxoethyl)sulfonyl)butanenitrile (4l).** The product was purified by silica gel column chromatography with petroleum ether/ethyl acetate (2:1, v/v). Yellow oil (0.0436 g, 81% yield); <sup>1</sup>H NMR (500 MHz, CDCl<sub>3</sub>) δ: 8.06-8.03 (m, 2H), 7.

21 (t, *J* = 8.5 Hz, 2H), 4.60 (s, 2H), 3.44 (t, *J* = 7.5 Hz, 2H), 2.64 (t, *J* = 7.5 Hz, 2H), 2.32-2.26 (m, 2H); <sup>13</sup>C NMR (126 MHz, CDCl<sub>3</sub>) δ: 187.4, 166.7 (d, *J*<sub>C-F</sub> = 259.2 Hz), 132.2 (d, *J*<sub>C-F</sub> = 9.8 Hz), 132.0 (d, *J*<sub>C-F</sub> = 2.9 Hz), 118.0, 116.4 (d, *J*<sub>C-F</sub> = 22.3 Hz), 60.1, 51.7, 18.3, 16.3; <sup>19</sup>F NMR (471 MHz, CDCl<sub>3</sub>) δ: -101.3; HRMS *m/z* (ESI) calcd for C<sub>12</sub>H<sub>13</sub>FN<sub>3</sub>O<sub>3</sub>S ([M+H]<sup>+</sup>) 270.0595, found 270.0591.

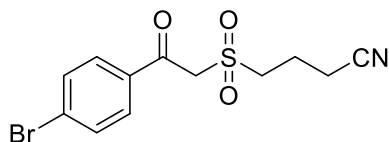

**4-((2-(4-Bromophenyl)-2-oxoethyl)sulfonyl)butanenitrile (4m).**<sup>3</sup> The product was purified by silica gel column chromatography with petroleum ether/ethyl acetate (2:1, v/v). 0.0

546 g, 83% yield; <sup>1</sup>H NMR (400 MHz, CDCl<sub>3</sub>) δ: 7.86 (d, *J* = 8.4 Hz, 2H), 7.68 (d, *J* = 8.4 Hz, 2H), 4.60 (s, 2H), 3.43 (t, *J* = 7.6 Hz, 2H), 2.64 (t, *J* =

7.2 Hz, 2H), 2.33-2.25 (m, 2H);  $^{13}\text{C}$  NMR (101 MHz,  $\text{CDCl}_3$ )  $\delta$ : 188.1, 134.1, 132.4, 130.6 (2), 118.0, 60.0, 51.7, 18.2, 16.3.

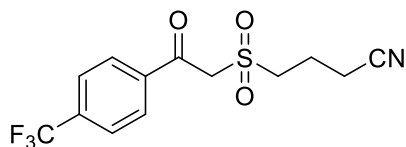

**4-((2-oxo-2-(4-(Trifluoromethyl)phenyl)ethyl)sulfonyl)butanenitrile (4n).**<sup>3</sup> The product was purified by silica gel column chromatography with

petroleum ether/ethyl acetate (2:1, v/v). 0.0536 g, 84% yield;  $^1\text{H}$  NMR (400 MHz,  $\text{CDCl}_3$ )  $\delta$ : 8.11 (d,  $J = 8.0$  Hz, 2H), 7.78 (d,  $J = 8.0$  Hz, 2H), 4.68 (s, 2H), 3.44 (t,  $J = 7.2$  Hz, 2H), 2.64 (t,  $J = 7.2$  Hz, 2H), 2.32-2.25 (m, 2H);  $^{13}\text{C}$  NMR (101 MHz,  $\text{CDCl}_3$ )  $\delta$ : 188.4, 138.0, 135.8 (m,  $J_{\text{C-F}} = 33.1$  Hz), 129.6, 126.1 (m,  $J_{\text{C-F}} = 3.6$  Hz), 123.2 (m,  $J_{\text{C-F}} = 274.0$  Hz), 118.1, 60.1, 51.8, 18.1, 16.2;  $^{19}\text{F}$  NMR (376 MHz,  $\text{CDCl}_3$ )  $\delta$ : -63.3.

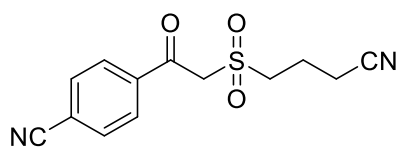

**4-(2-((3-Cyanopropyl)sulfonyl)acetyl)benzonitrile (4o).**<sup>3</sup> The product was purified by silica gel

column chromatography with petroleum ether/ethyl acetate (1:1, v/v). 0.0442 g, 80% yield;  $^1\text{H}$  NMR (400 MHz,  $\text{CDCl}_3$ )  $\delta$ : 8.11 (d,  $J = 8.0$  Hz, 2H), 7.84 (d,  $J = 8.0$  Hz, 2H), 4.64 (s, 2H), 3.43 (t,  $J = 7.2$  Hz, 2H), 2.65 (t,  $J = 7.2$  Hz, 2H), 2.33-2.26 (m, 2H);  $^{13}\text{C}$  NMR (101 MHz,  $\text{CDCl}_3$ )  $\delta$ : 188.0, 138.2, 132.8, 129.7, 127.8, 118.0, 117.4, 60.3, 51.8, 18.2, 16.3.

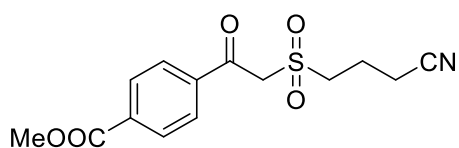

**Methyl 4-(2-((3-cyanopropyl)sulfonyl)acetyl)benzoate (4p).**<sup>3</sup> The product was purified by

silica gel column chromatography with p

petroleum ether/ethyl acetate (2:1, v/v). 0.0532 g, 86% yield; <sup>1</sup>H NMR (400 MHz, CDCl<sub>3</sub>) δ: 8.13 (d, *J* = 6.4 Hz, 2H), 8.02 (t, *J* = 7.2 Hz, 2H), 4.68 (s, 2H), 3.94 (s, 3H), 3.44 (t, *J* = 7.6 Hz, 2H), 2.63 (t, *J* = 6.8 Hz, 2H), 2.30-2.23 (m, 2H); <sup>13</sup>C NMR (101 MHz, CDCl<sub>3</sub>) δ: 188.7, 165.7, 138.3, 135.2, 130.0, 129.1, 118.1, 60.0, 52.6, 51.7, 18.1, 16.2.

**4-((2-(4-Nitrophenyl)-2-oxoethyl)sulfonyl)butanenitrile**

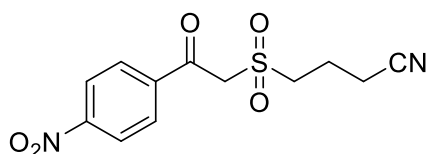

**nenitrile (4q).**<sup>3</sup> The product was purified by

silica gel column chromatography with petrol

eum ether/ethyl acetate (1:1, v/v). 0.0468 g, 79% yield; <sup>1</sup>H NMR (400 MHz, DMSO-d<sub>6</sub>) δ: 8.39 (d, *J* = 8.8 Hz, 2H), 8.28 (d, *J* = 8.8 Hz, 2H), 5.31 (s, 2H), 3.44 (t, *J* = 8.0 Hz, 2H), 2.71 (t, *J* = 7.2 Hz, 2H), 2.51-2.50 (m, 2H), 2.12-2.05 (m, 2H); <sup>13</sup>C NMR (101 MHz, DMSO-d<sub>6</sub>) δ: 189.3, 150.5, 140.3, 130.5, 123.9, 119.7, 59.8, 52.1, 17.8, 15.3.

**4-((2-oxo-2-(*m*-Tolyl)ethyl)sulfonyl)butanenitrile**

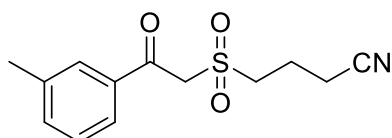

**(4r).** The product was purified by silica gel c

olumn chromatography with petroleum ether/eth

yl acetate (2:1, v/v). Yellow solid (0.0387 g, 73% yield); <sup>1</sup>H NMR (400 MHz, CDCl<sub>3</sub>) δ: 7.79 (s, 1H), 7.77-7.72 (m, 1H), 7.50-7.46 (m, 1H), 7.42 (t, *J* = 7.6 Hz, 1H), 4.61 (s, 2H), 3.45 (t, *J* = 7.2 Hz, 2H), 2.64 (t, *J* = 7.2 Hz, 2H), 2.44 (s, 3H), 2.33-2.26 (m, 2H); <sup>13</sup>C NMR (101 MHz, CDCl<sub>3</sub>) δ: 189.1, 139.1, 135.7, 135.5, 129.6, 128.9, 126.5, 118.0, 60.0, 51.8, 21.3, 18.3, 16.3. HRMS *m/z* (ESI) calcd for C<sub>13</sub>H<sub>15</sub>NO<sub>3</sub>SNa ([M+Na]<sup>+</sup>) 288.0665, found 288.0668.

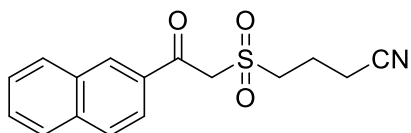

**4-((2-(Naphthalen-2-yl)-2-oxoethyl)sulfonyl)butanenitrile (4s).**<sup>3</sup> The product was purified by

silica gel column chromatography with petroleum ether/ethyl acetate (2:1, v/v). 0.0434 g, 72% yield; <sup>1</sup>H NMR (400 MHz, CDCl<sub>3</sub>) δ: 8.75 (d, *J* = 8.4 Hz, 1H), 8.10-8.05 (m, 2H), 7.91 (d, *J* = 8.0 Hz, 1H), 7.66 (t, *J* = 7.2 Hz, 1H), 7.58-7.55 (m, 2H), 4.72 (s, 2H), 3.51 (t, *J* = 7.6 Hz, 2H), 2.63 (t, *J* = 7.2 Hz, 2H), 2.33-2.25 (m, 2H); <sup>13</sup>C NMR (101 MHz, CDCl<sub>3</sub>) δ: 191.2, 142.1, 135.3, 133.9, 132.9, 131.1, 129.1, 128.7, 127.0, 125.3, 124.3, 118.1, 62.6, 51.9, 18.3, 16.3.

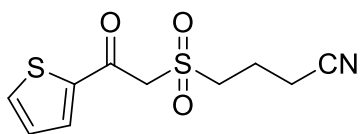

**4-((2-oxo-2-(Thiophen-2-yl)ethyl)sulfonyl)butanenitrile (4t).**

The product was purified by silica gel column chromatography with petroleum ether/ethyl acetate (2:1, v/v). Brown solid (0.0380 g, 74% yield); <sup>1</sup>H NMR (400 MHz, CDCl<sub>3</sub>) δ: 7.85 (t, *J* = 4.0 Hz, 2H), 7.23 (t, *J* = 4.4 Hz, 1H), 4.53 (s, 2H), 3.45 (t, *J* = 7.6 Hz, 2H), 2.65 (t, *J* = 7.2 Hz, 2H), 2.34-2.27 (m, 2H); <sup>13</sup>C NMR (101 MHz, CDCl<sub>3</sub>) δ: 180.9, 142.7, 137.5, 135.6, 129.0, 118.0, 61.0, 51.6, 18.3, 16.3; HRMS *m/z* (ESI) calcd for C<sub>10</sub>H<sub>12</sub>NNaO<sub>3</sub>S<sub>2</sub> ([M+Na]<sup>+</sup>) 280.0073, found 280.0076.

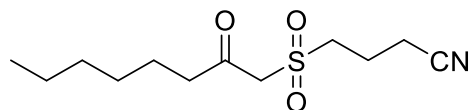

**4-((2-Oxo-octyl)sulfonyl)butanenitrile (4u).**

The product was purified by silica gel column chromatography with petroleum ether/ethyl acetate (2:1, v/v). Yellow oil (0.0394 g, 76% yield); <sup>1</sup>H NMR (400 MHz, CDCl<sub>3</sub>) δ: 4.03 (s, 2H), 3.32 (t,

$J = 7.6$  Hz, 2H), 2.69 (t,  $J = 7.2$  Hz, 2H), 2.62 (t,  $J = 7.2$  Hz, 2H), 2.29-2.22 (m, 2H), 1.62-1.57 (m, 4H), 1.33-1.27 (m, 4H), 0.88 (t,  $J = 6.4$  Hz, 3H);  $^{13}\text{C}$  NMR (101 MHz,  $\text{CDCl}_3$ )  $\delta$ : 199.5, 117.9, 63.2, 51.5, 45.1, 31.4, 28.4, 22.9, 22.4, 18.2, 16.3, 14.0; HRMS  $m/z$  (ESI) calcd for  $\text{C}_{12}\text{H}_{22}\text{NO}_3\text{S}$  ( $[\text{M}+\text{H}]^+$ ) 260.1315, found 260.1311.

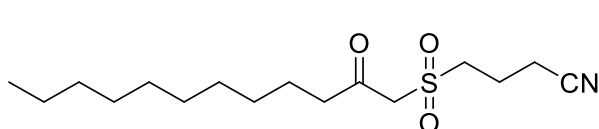

**4-((2-Oxododecyl)sulfonyl)butanenitrile (4v).** The product was purified by silica gel column chromatography with petroleum ether/ethyl acetate

(2:1, v/v). White solid (0.0466 g, 74% yield);  $^1\text{H}$  NMR (400 MHz,  $\text{CDCl}_3$ )  $\delta$ : 3.98 (s, 2H), 3.25 (t,  $J = 7.2$  Hz, 2H), 2.62 (t,  $J = 7.2$  Hz, 2H), 2.56 (t,  $J = 7.2$  Hz, 2H), 2.21-2.14 (m, 2H), 1.54 (t,  $J = 6.4$  Hz, 2H), 1.26-1.18 (m, 14 H), 0.81 (t,  $J = 6.4$  Hz, 3H);  $^{13}\text{C}$  NMR (101 MHz,  $\text{CDCl}_3$ )  $\delta$ : 199.5, 118.0, 63.1, 51.5, 45.0, 31.8, 29.5, 29.3, 29.2 (2), 28.7, 22.9, 22.6, 18.2, 16.2, 14.1; HRMS  $m/z$  (ESI) calcd for  $\text{C}_{16}\text{H}_{30}\text{NO}_3\text{S}$  ( $[\text{M}+\text{H}]^+$ ) 316.1941, found 316.1947.

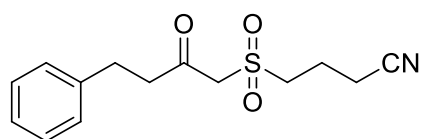

**4-((2-oxo-4-Phenylbutyl)sulfonyl)butanenitrile (4w).** The product was purified by silica gel column chromatography with petroleum ether/ethyl acetate (2:1, v/v). Yellow oil

(0.0368 g, 66% yield);  $^1\text{H}$  NMR (400 MHz,  $\text{CDCl}_3$ )  $\delta$ : 7.23 (t,  $J = 6.8$  Hz, 2H), 7.18-7.13 (m, 3H), 3.96 (s, 2H), 3.16 (t,  $J = 7.6$  Hz, 2H), 3.00 (t,  $J = 7.2$  Hz, 2H), 2.89 (t,  $J = 7.2$  Hz, 2H), 2.52 (t,  $J = 7.2$  Hz, 2H), 2.17-2.10 (m, 2H);  $^{13}\text{C}$  NMR (101 MHz,  $\text{CDCl}_3$ )  $\delta$ : 198.5, 139.7, 128.6, 128.4, 126.4, 118.0, 63.6, 51.4, 46.2, 29.0, 18.1, 16.2; HRMS  $m/z$  (ESI) calcd for  $\text{C}_{14}\text{H}_{17}\text{NNaO}_3\text{S}$

([M+Na]<sup>+</sup>) 302.0821, found 302.0821.

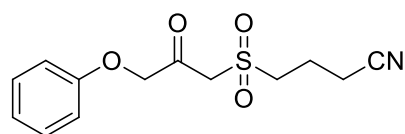

**4-((2-oxo-3-Phenoxypropyl)sulfonyl)butanenitril**

**e (4x).** The product was purified by silica gel column chromatography with petroleum ether/ethyl acetate (2:1, v/v). Yellow oil (0.0315 g, 56% yield); <sup>1</sup>H NMR (400 MHz, CDCl<sub>3</sub>) δ: 7.31 (t, *J* = 7.6 Hz, 2H), 7.03 (t, *J* = 7.2 Hz, 1H), 6.90 (d, *J* = 8.0 Hz, 2H), 4.75 (s, 2H), 4.30 (s, 2H), 3.35 (t, *J* = 7.6 Hz, 2H), 2.60 (t, *J* = 7.2 Hz, 2H), 2.50-2.18 (m, 2H); <sup>13</sup>C NMR (101 MHz, CDCl<sub>3</sub>) δ: 196.4, 156.9, 129.8, 122.3, 118.1, 114.5, 72.8, 59.7, 51.9, 18.0, 16.1; HRMS *m/z* (ESI) calculated for C<sub>13</sub>H<sub>16</sub>NO<sub>4</sub>S ([M+H]<sup>+</sup>) 282.0795, found 282.0797.

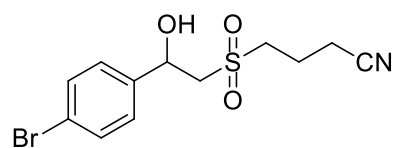

**4-((2-(4-Bromophenyl)-2-hydroxyethyl)sulfonyl)butanenitrile (7a).**

The product was purified by silica gel column chromatography with petroleum ether/ethyl acetate (2:1, v/v). 0.0530 g, 80% yield; <sup>1</sup>H NMR (500 MHz, CDCl<sub>3</sub>) δ: 7.51 (d, *J* = 8.5 Hz, 2H), 7.25 (d, *J* = 8.5 Hz, 2H), 5.27 (d, *J* = 10.5 Hz, 1H), 3.44-3.39 (m, 2H), 3.39-3.28 (m, 2H), 3.08 (d, *J* = 14.5 Hz, 1H), 2.61 (t, *J* = 7.0 Hz, 2H), 2.25-2.20 (m, 2H); <sup>13</sup>C NMR (126 MHz, CDCl<sub>3</sub>) δ: 140.0, 132.0, 127.3, 122.5, 118.3, 68.5, 61.0, 52.8, 18.1, 16.3; HRMS *m/z* (ESI) calculated for C<sub>12</sub>H<sub>15</sub>BrNO<sub>3</sub>S ([M+H]<sup>+</sup>) 331.9951, found 331.9953.

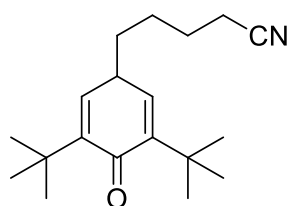

**5-(3,5-di-tert-Butyl-4-oxocyclohexa-2,5-dien-1-yl)pentanenitrile (9a).**

<sup>4</sup> The product was purified by silica gel column chromatography with petroleum ether/ethyl acetate

(10:1, v/v). 0.0385 g, 67% yield;  $^1\text{H}$  NMR (400 MHz,  $\text{CDCl}_3$ )  $\delta$ : 6.36 (s, 2H), 2.26 (t,  $J = 6.8$  Hz, 2H), 1.71 (t,  $J = 8.4$  Hz, 2H), 1.39-1.25 (m, 5H), 1.20 (s, 18H);  $^{13}\text{C}$  NMR (101 MHz,  $\text{CDCl}_3$ )  $\delta$ : 186.1, 147.2, 145.3, 119.1, 39.7, 39.5, 34.6, 29.4, 27.2, 20.8, 17.2.

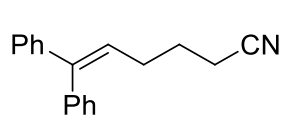

**6,6-Diphenylhex-5-enenitrile (10a).**<sup>5</sup> The product was purified by silica gel column chromatography with petroleum ether/ethyl acetate (6:1, v/v). 0.0129 g, 26% yield;  $^1\text{H}$  NMR (400 MHz,  $\text{CDCl}_3$ )  $\delta$ : 7.37 (t,  $J = 7.6$  Hz, 3H), 7.21 (t,  $J = 10.4$  Hz, 5H), 7.15 (d,  $J = 7.6$  Hz, 2H), 6.00 (t,  $J = 7.6$  Hz, 1H), 2.31-2.23 (m, 4H), 1.83-1.75 (m, 2H);  $^{13}\text{C}$  NMR (101 MHz,  $\text{CDCl}_3$ )  $\delta$ : 143.8, 142.1, 139.6, 129.7, 128.4, 128.2, 127.2 (2), 126.6, 125.8, 119.5, 28.7, 25.7, 16.7.

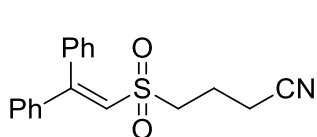

**4-((2,2-Diphenylvinyl)sulfonyl)butanenitrile (11a).**<sup>5</sup> The product was purified by silica gel column chromatography with petroleum ether/ethyl acetate (2:1, v/v). 0.0299 g, 48% yield;  $^1\text{H}$  NMR (400 MHz,  $\text{CDCl}_3$ )  $\delta$ : 7.51-7.46 (m, 4H), 7.42-7.38 (m, 4H), 7.30 (t,  $J = 6.8$  Hz, 2H), 6.82 (s, 1H), 2.89 (t,  $J = 7.2$  Hz, 2H), 2.50 (t,  $J = 7.2$  Hz, 2H), 2.15-2.08 (m, 2H);  $^{13}\text{C}$  NMR (101 MHz,  $\text{CDCl}_3$ )  $\delta$ : 156.7, 143.8, 138.8, 135.3, 130.7, 129.7, 128.8, 128.7, 128.4, 125.8, 118.1, 52.7, 18.8, 16.2.

## (F) References

[1] Z. Liu, P. Liao and X. Bi, General Silver-Catalyzed Hydroazidation of Terminal Alkynes by Combining TMS- $\text{N}_3$  and  $\text{H}_2\text{O}$ : Synthesis of Vinyl Azides, *Org. Lett.*, 2014, **16**, 3668-3671.



- [2] a) X. Y. Yu, J. R. Chen, P. Z. Wang, M. N. Yang, D. Liang and W. J. Xia, A Visible-Light-Driven Iminyl Radical-Mediated C–C Single Bond Cleavage/Radical Addition Cascade of Oxime Esters, *Angew. Chem. Int. Ed.*, 2018, **57**, 738-743; b) B. L. Zhao and Z. Z. Shi, Copper-Catalyzed Intermolecular Heck-Like Coupling of Cyclobutanone Oximes Initiated by Selective C–C Bond Cleavage, *Angew. Chem. Int. Ed.*, 2017, **56**, 12727-12731; c) Y. R. Gu, X. H. Duan, L. Yang and L. N. Guo, Direct C–H Cyanoalkylation of Heteroaromatic *N*-oxides and Quinones via C–C Bond Cleavage of Cyclobutanone Oximes, *Org. Lett.*, 2017, **19**, 5908-5911; d) L. Y. Li, H. G. Chen, M. J. Mei and L. Zhou, Visible-Light Promoted  $\gamma$ -Cyanoalkyl Radical Generation: Three-Component Cyanopropylation/Etherification of Unactivated Alkenes, *Chem. Commun.*, 2017, **53**, 11544-11547.
- [3] M. Zheng, G. Li and H. Lu, Photoredox- or Metal-Catalyzed in situ SO<sub>2</sub>-Capture Reactions: Synthesis of  $\beta$ -Ketosulfones and Allylsulfones, *Org. Lett.*, 2019, **21**, 1216-1220.
- [4] L. Tian, S. Gao, R. Y. C. Wang, L. Li, Tang and J. Fu, Copper-Catalyzed Ring-Opening C(sp<sup>3</sup>)–N Coupling of Cycloketone Oxime Esters: Access to 1°, 2° and 3° Alkyl Amines, *Chem. Commun.*, 2019, **55**, 5347-5350.
- [5] a) N. Zhou, X. Wu, K. Kuang, Z. Xia, Q. Xu and M., Zhang, A Photoredox- or Metal-Catalyzed Three-Component Cyanoalkylsulfonylation Reaction of 1-(allyloxy)-2-(1-arylvinyl)benzenes, Potassium Metabisulfite, and Cycloketone Oxime Esters: Synthesis of Cyanoalkylsulfonylated Benzoxepines, *Org. Chem.*

*Front.*, 2021, **8**, 6032-6037. b) X. Zheng, T. Zhong, X. Yi, Q. Shen, C. Yin, L. Zhang, J. Zhou, J. Chen and C. Yu, Iron-Catalyzed Three-Component Cyanoalkylsulfonylation of 2,3-Allenic Acids, Sulfur Dioxide, and Cycloketone Oxime Esters: Access to Cyanoalkylsulfonylated Butenolides, *Adv. Synth. Catal.*, 2021, **363**, 3359-3364.

(G) Spectra

4-((2-(4-Chlorophenyl)-2-oxoethyl)suonyl)butanenitrile (4a)

$^1\text{H}$  NMR-spectrum (400 MHz,  $\text{CDCl}_3$ ) of 4a

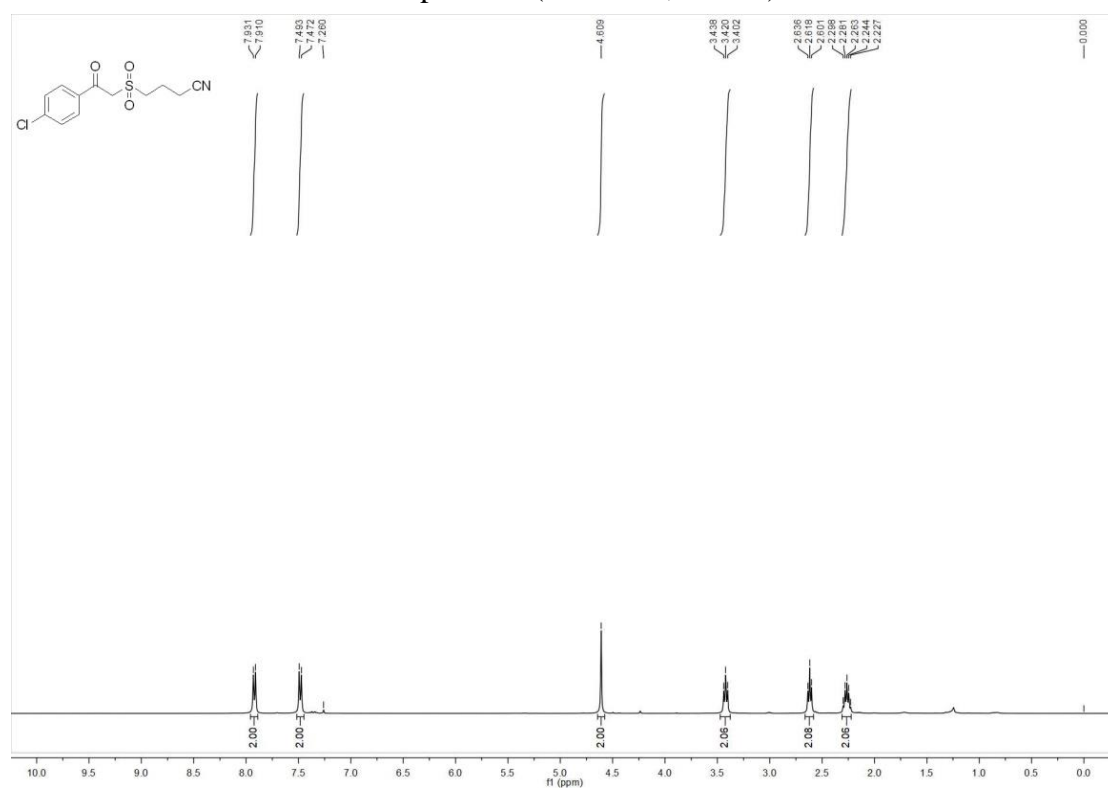

$^{13}\text{C}$  NMR-spectrum (101 MHz,  $\text{CDCl}_3$ ) of 4a

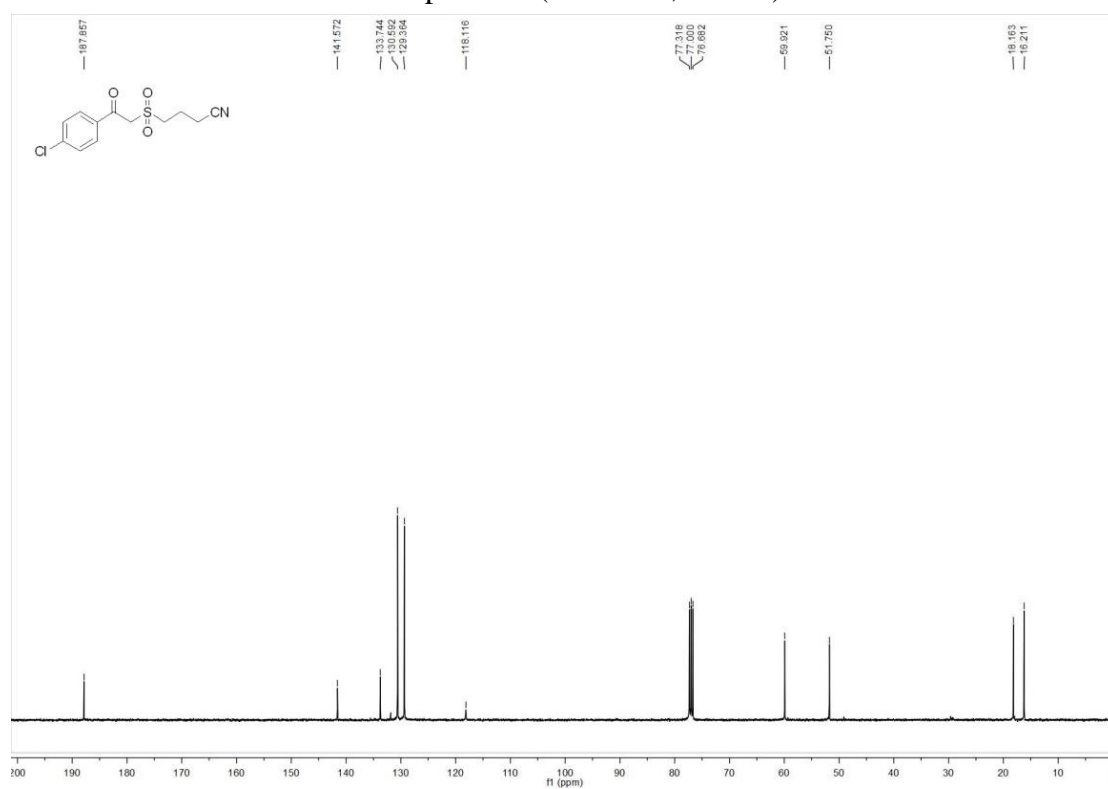

### 3-4-((2-(4-Chlorophenyl)-2-oxoethyl)sulfonyl)-3-phenylbutanenitrile (4b)

$^1\text{H}$  NMR-spectrum (400 MHz,  $\text{CDCl}_3$ ) of **4b**

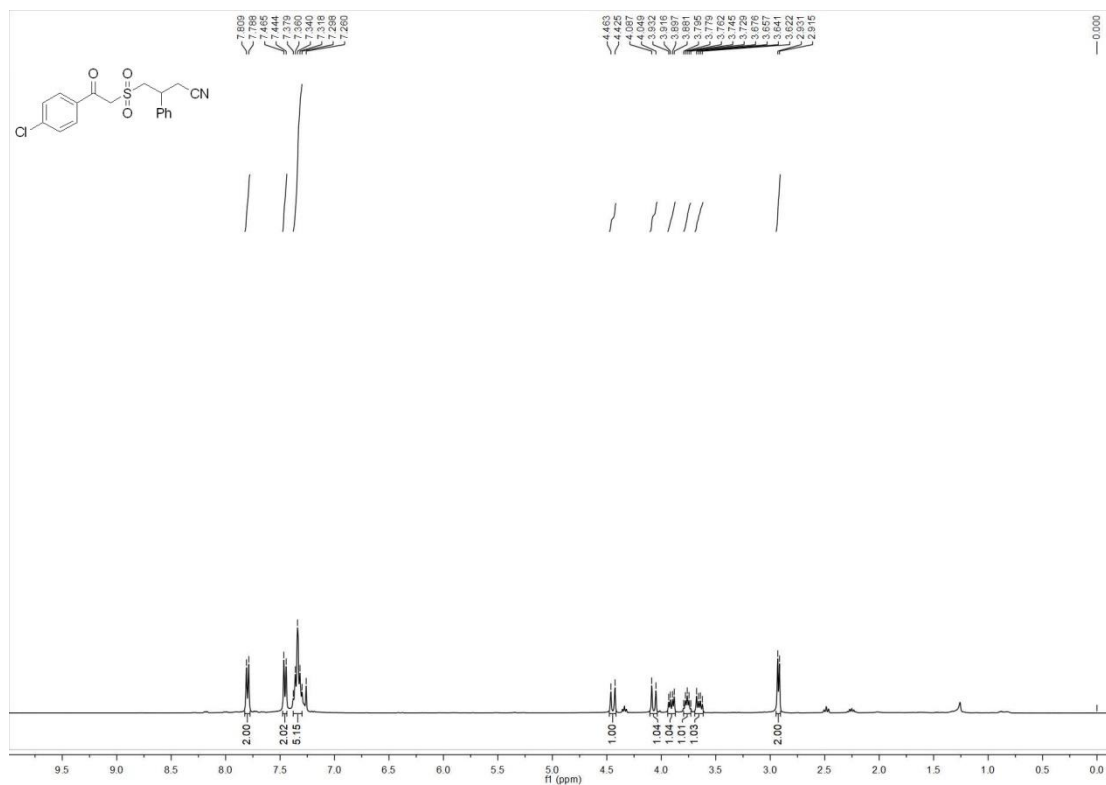

$^{13}\text{C}$  NMR-spectrum (101MHz,  $\text{CDCl}_3$ ) of **4b**

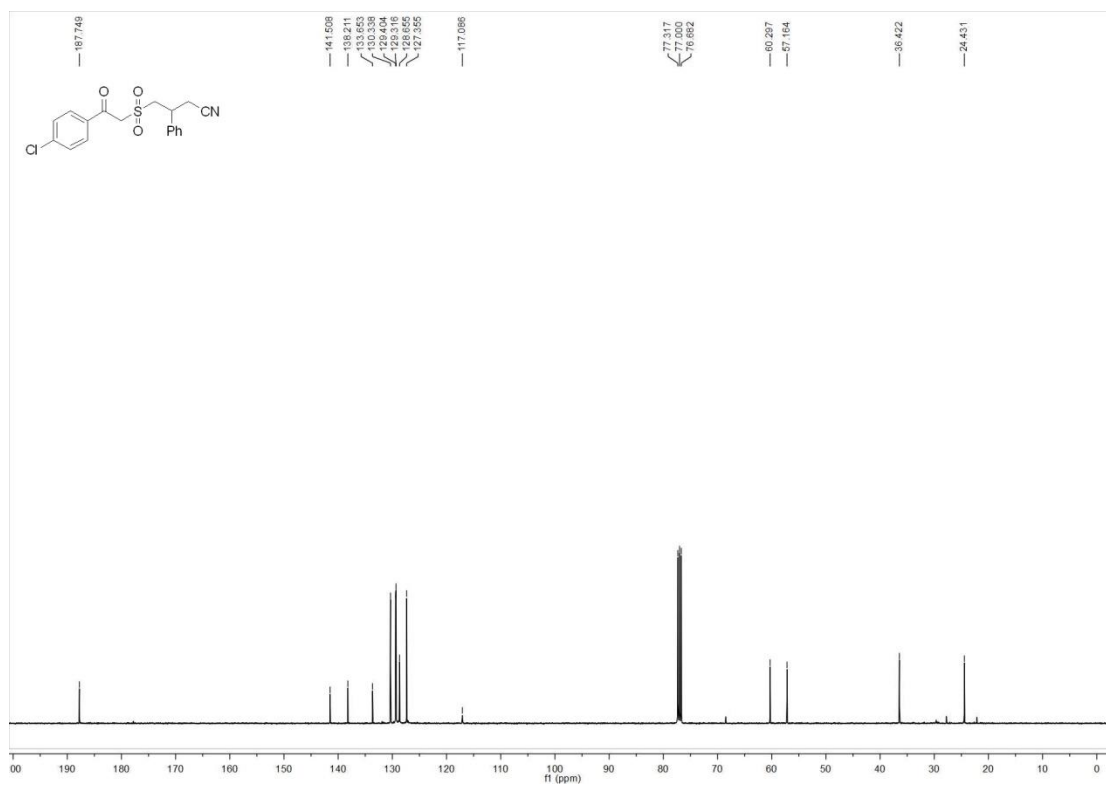

### 3-(Benzyloxy)-4-((2-(4-chlorophenyl)-2-oxoethyl)sulfonyl)butanenitrile (4c)

<sup>1</sup>H NMR-spectrum (400 MHz, CDCl<sub>3</sub>) of 4c

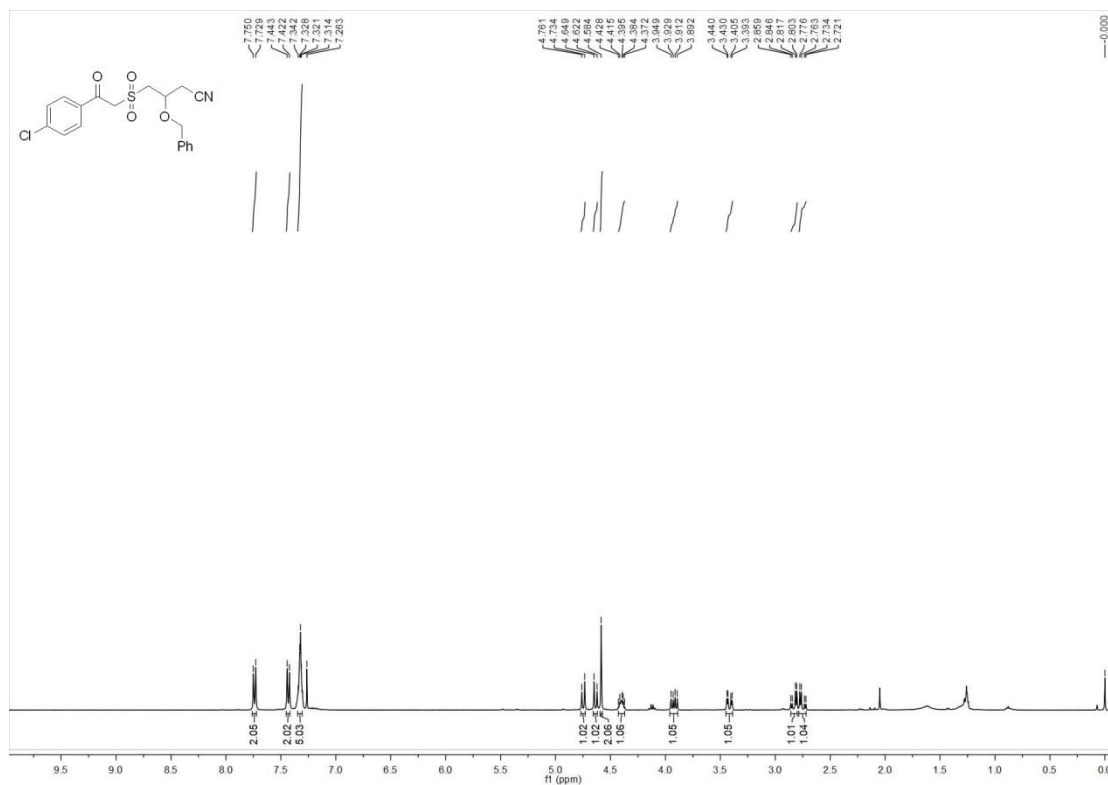

<sup>13</sup>C NMR-spectrum (101 MHz, CDCl<sub>3</sub>) of 4c

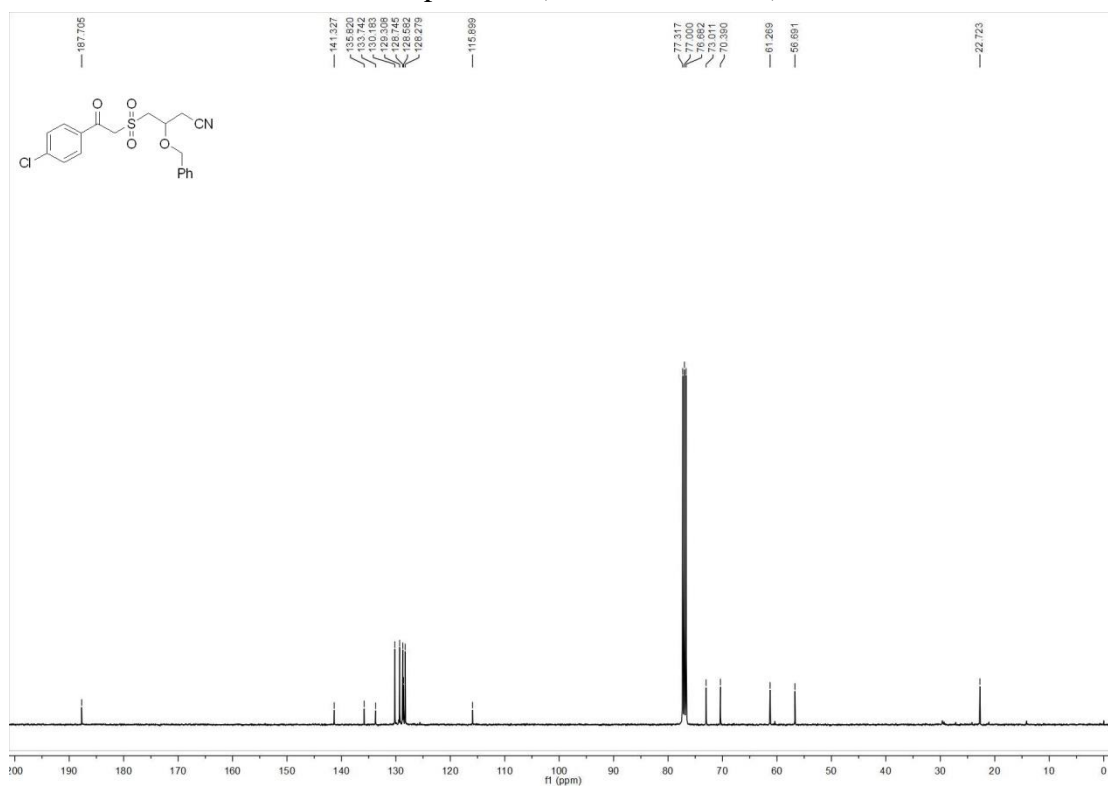

2-(((2-(4-Chlorophenyl)-2-oxoethyl)sulfonyl)methoxy)acetonitrile (4d)

$^1\text{H}$  NMR-spectrum (400 MHz,  $\text{CDCl}_3$ ) of 4d

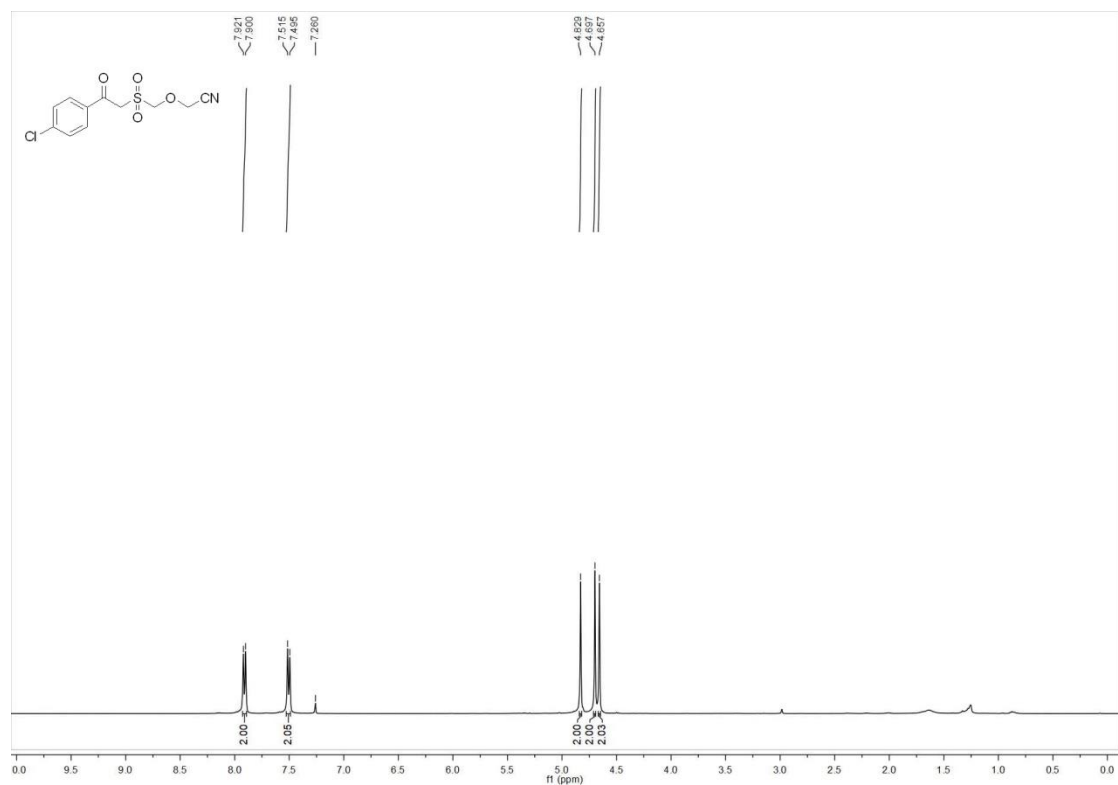

$^{13}\text{C}$  NMR-spectrum (101 MHz,  $\text{CDCl}_3$ ) of 4d

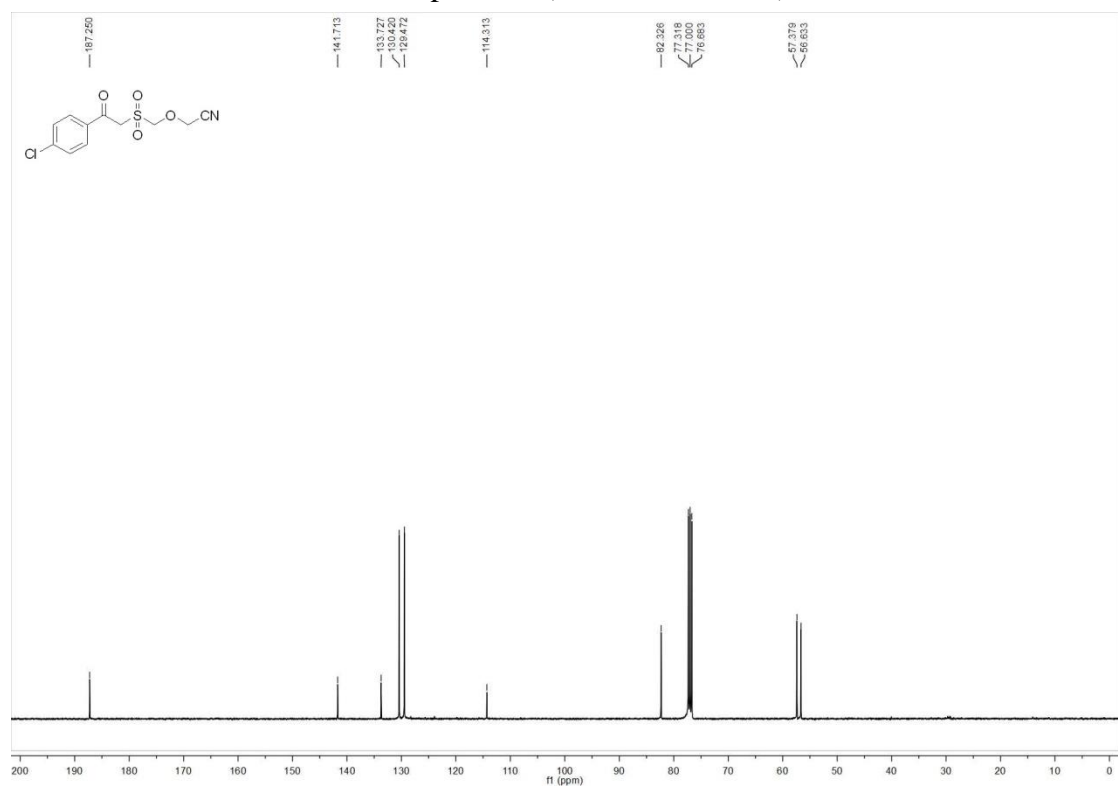

### 4-((2-(3-Chlorophenyl)-2-oxoethyl)sulfonyl)butanenitrile (4e)

<sup>1</sup>H NMR-spectrum (400 MHz, CDCl<sub>3</sub>) of 4e

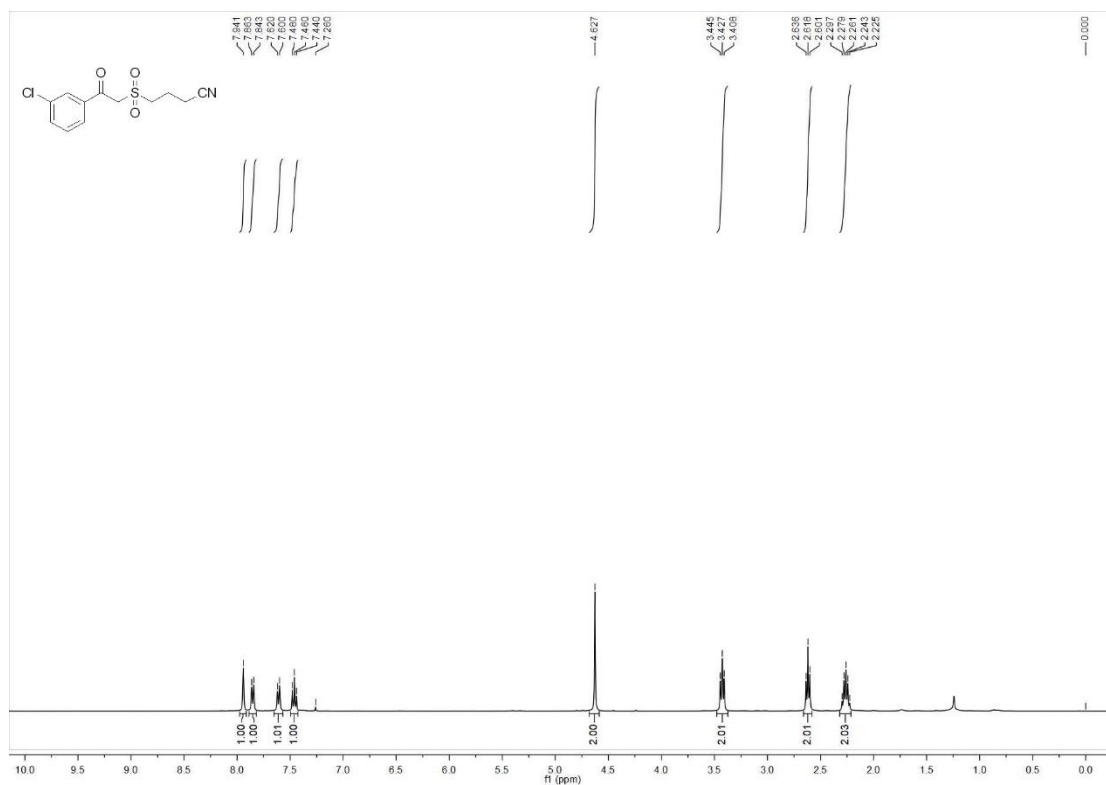

<sup>13</sup>C NMR-spectrum (101 MHz, CDCl<sub>3</sub>) of 4e

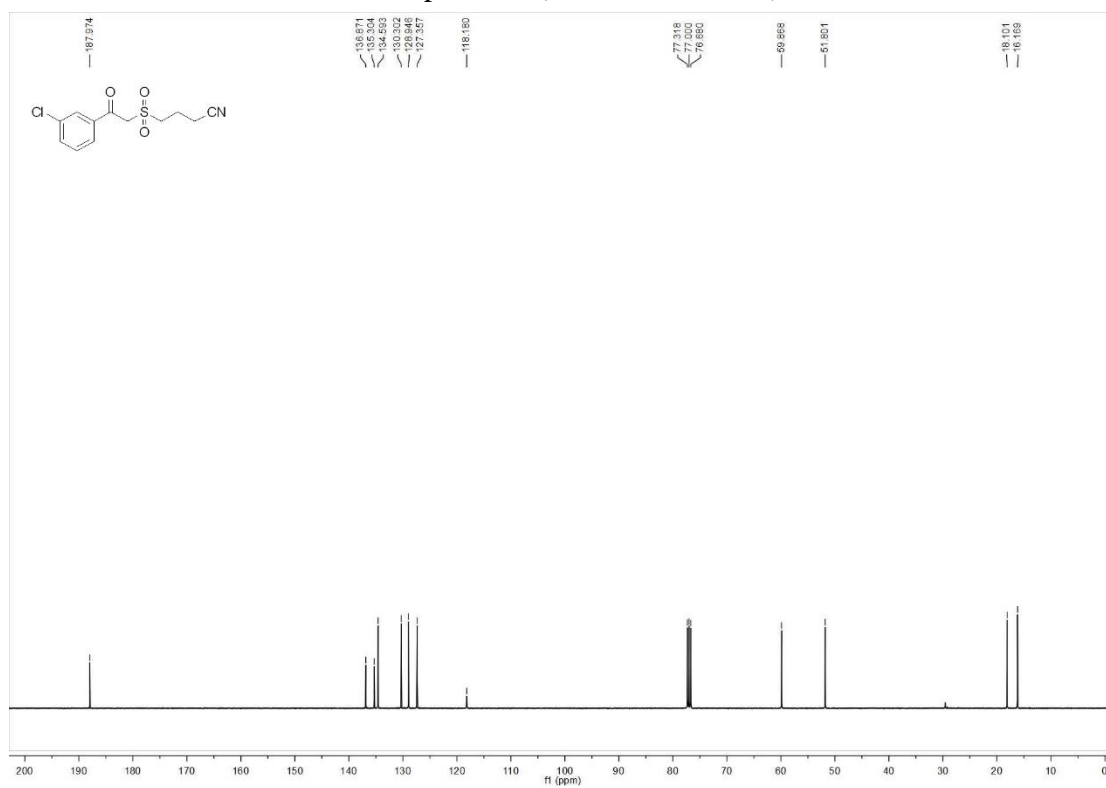

### 4-((2-(2-Chlorophenyl)-2-oxoethyl)sulfonyl)butanenitrile (4f)

<sup>1</sup>H NMR-spectrum (500 MHz, CDCl<sub>3</sub>) of 4f

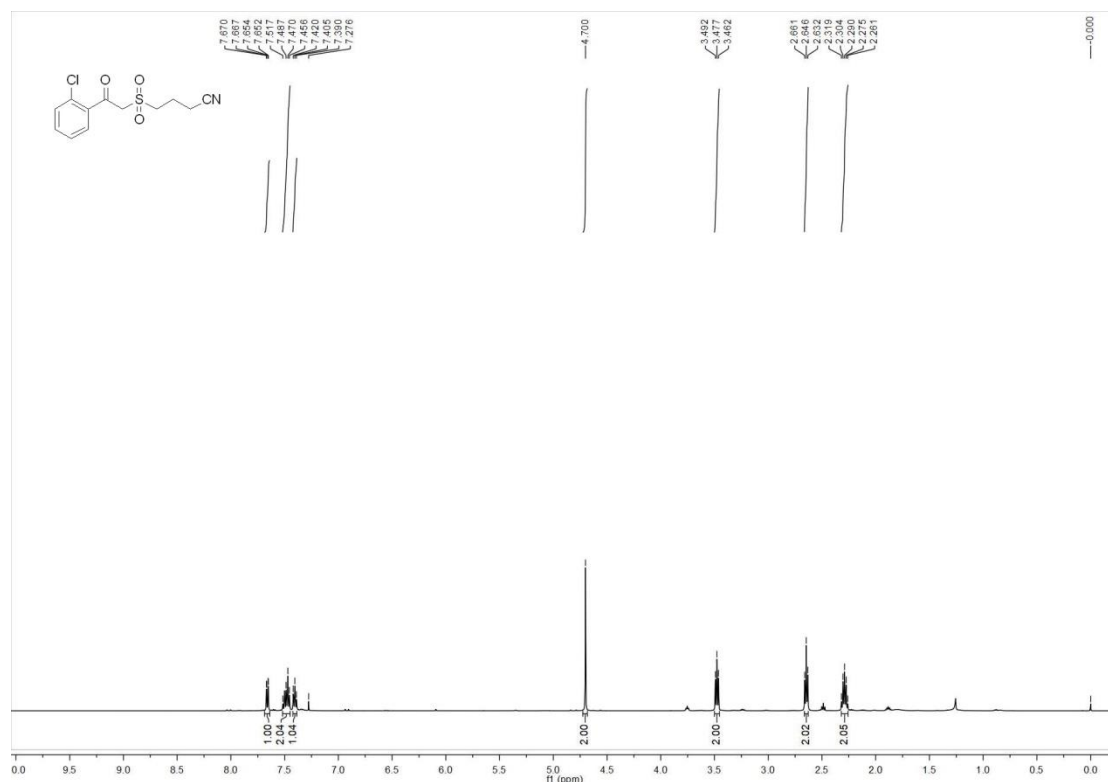

<sup>13</sup>C NMR-spectrum (126 MHz, CDCl<sub>3</sub>) of 4f

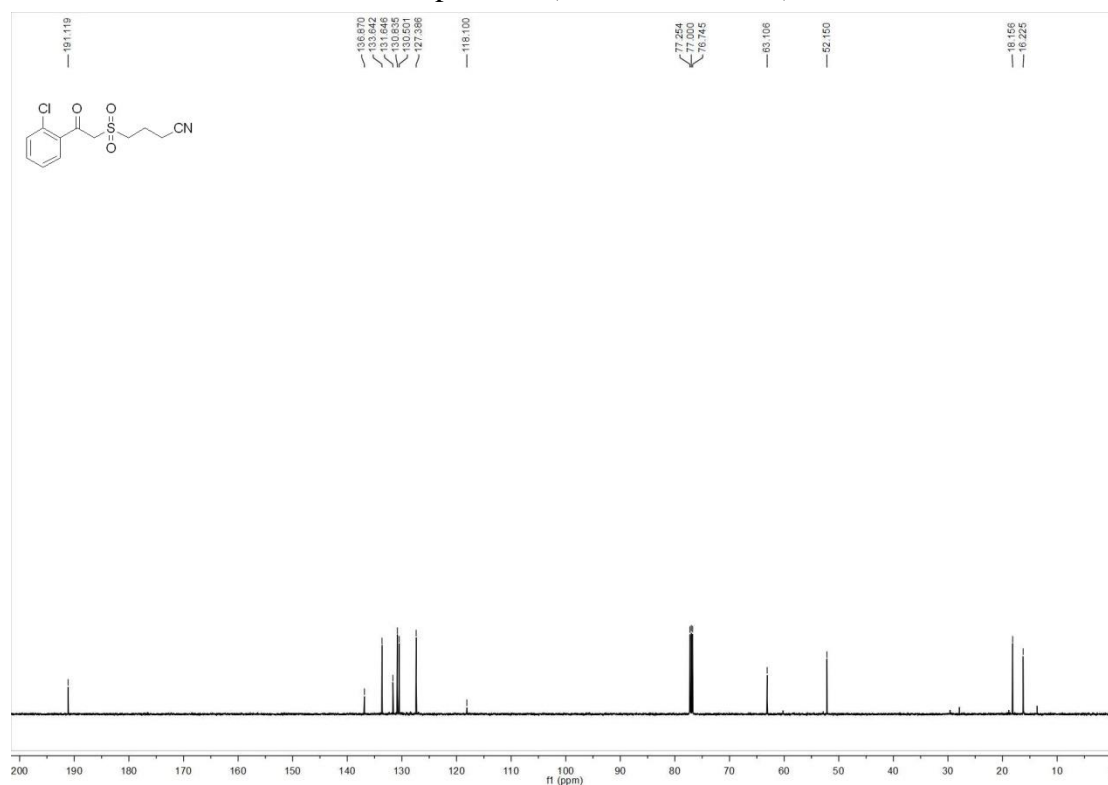



### 4-((2-oxo-2-(p-Tolyl)ethyl)sulfonyl)butanenitrile (4g)

<sup>1</sup>H NMR-spectrum (400 MHz, CDCl<sub>3</sub>) of 4g

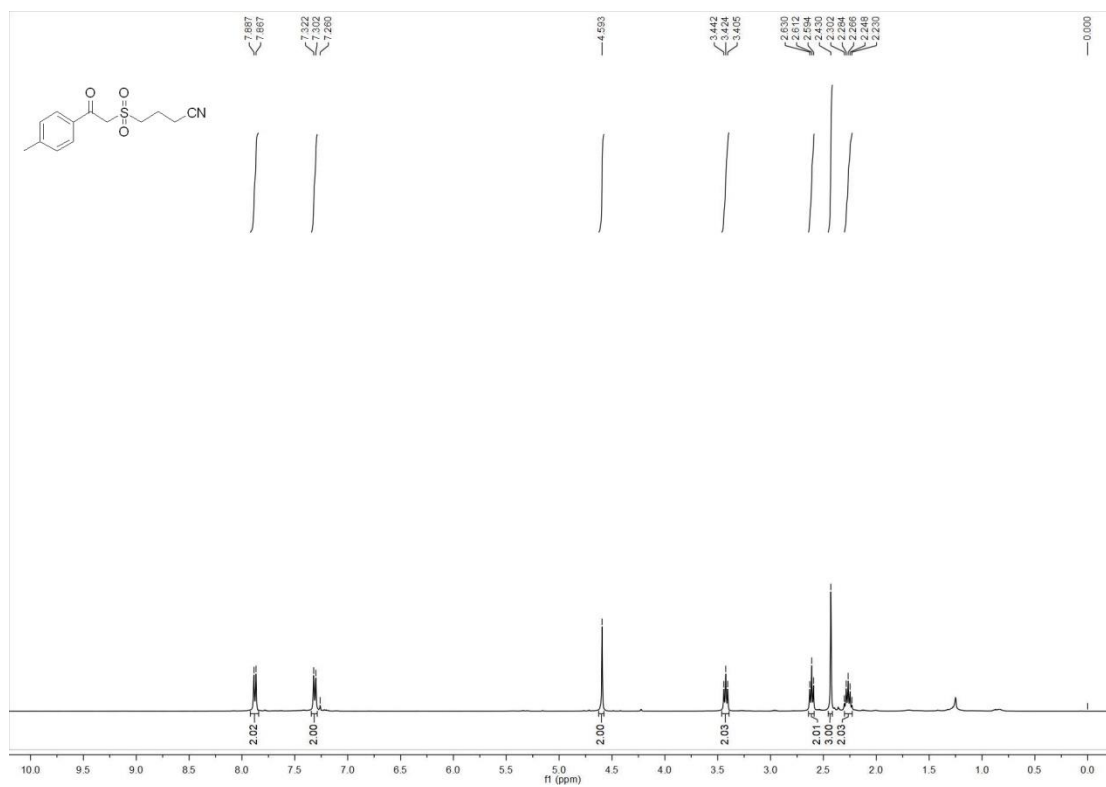

<sup>13</sup>C NMR-spectrum (101 MHz, CDCl<sub>3</sub>) of 4g

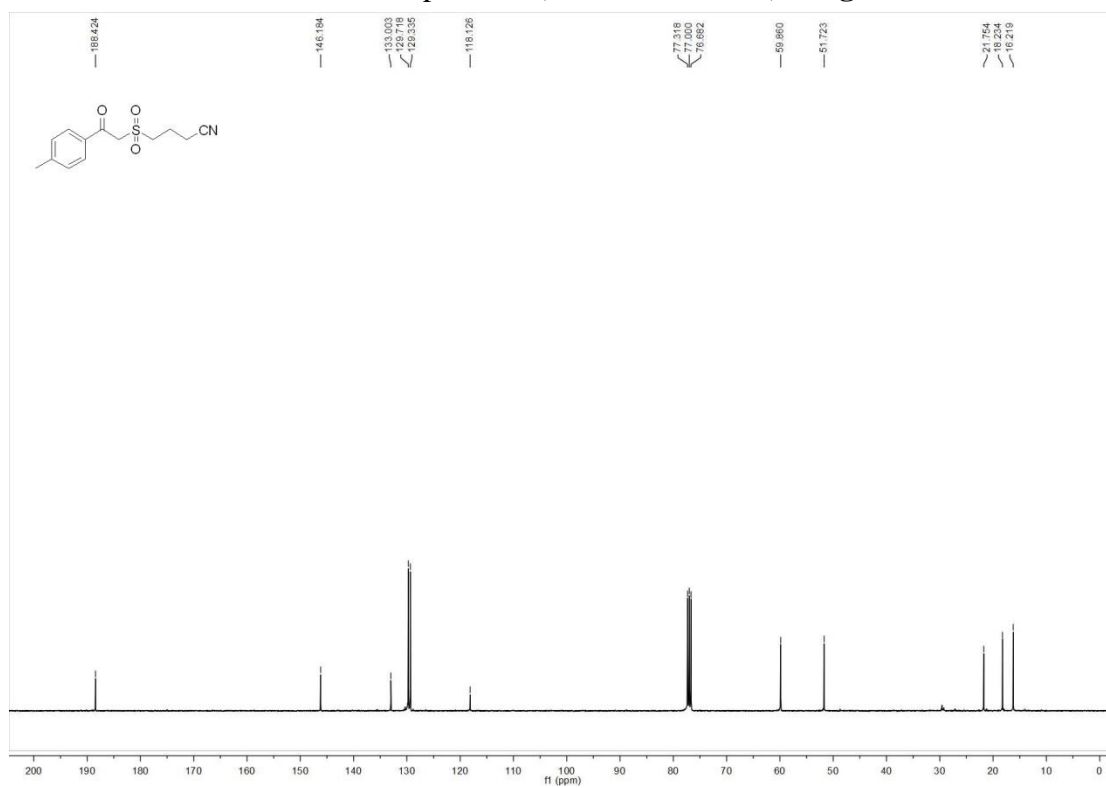

### 4-((2-(4-(*tert*-Butyl)phenyl)-2-oxoethyl)sulfonyl)butanenitrile (**4h**)

<sup>1</sup>H NMR-spectrum (400 MHz, CDCl<sub>3</sub>) of **4h**

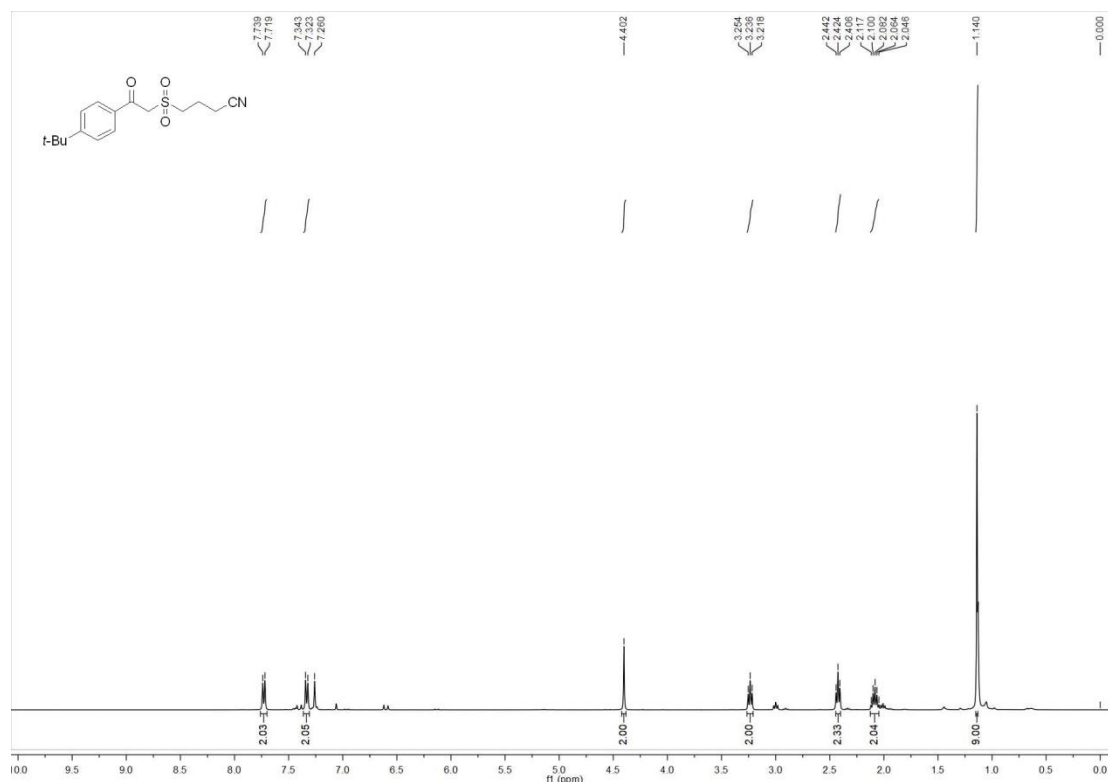

<sup>13</sup>C NMR-spectrum (101 MHz, CDCl<sub>3</sub>) of **4h**

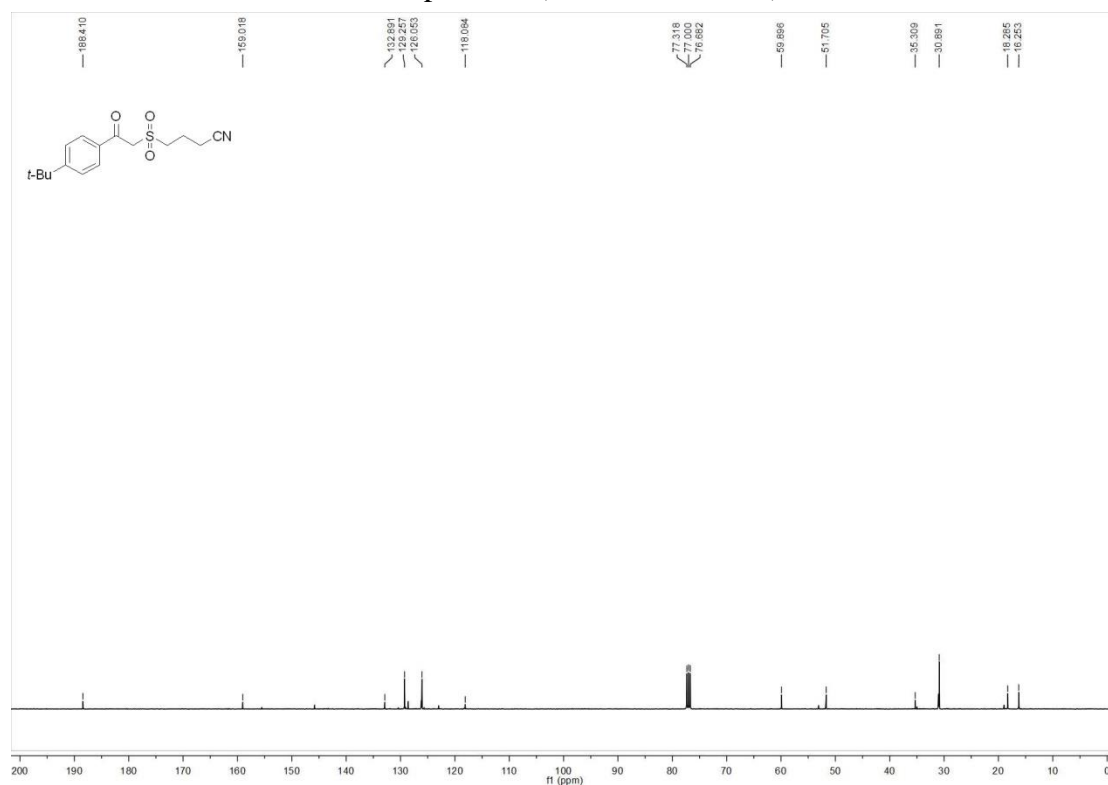

### 3-4-((2-(4-Butylphenyl)-2-oxoethyl)sulfonyl)butanenitrile (**4i**)

<sup>1</sup>H NMR-spectrum (500 MHz, CDCl<sub>3</sub>) of **4i**

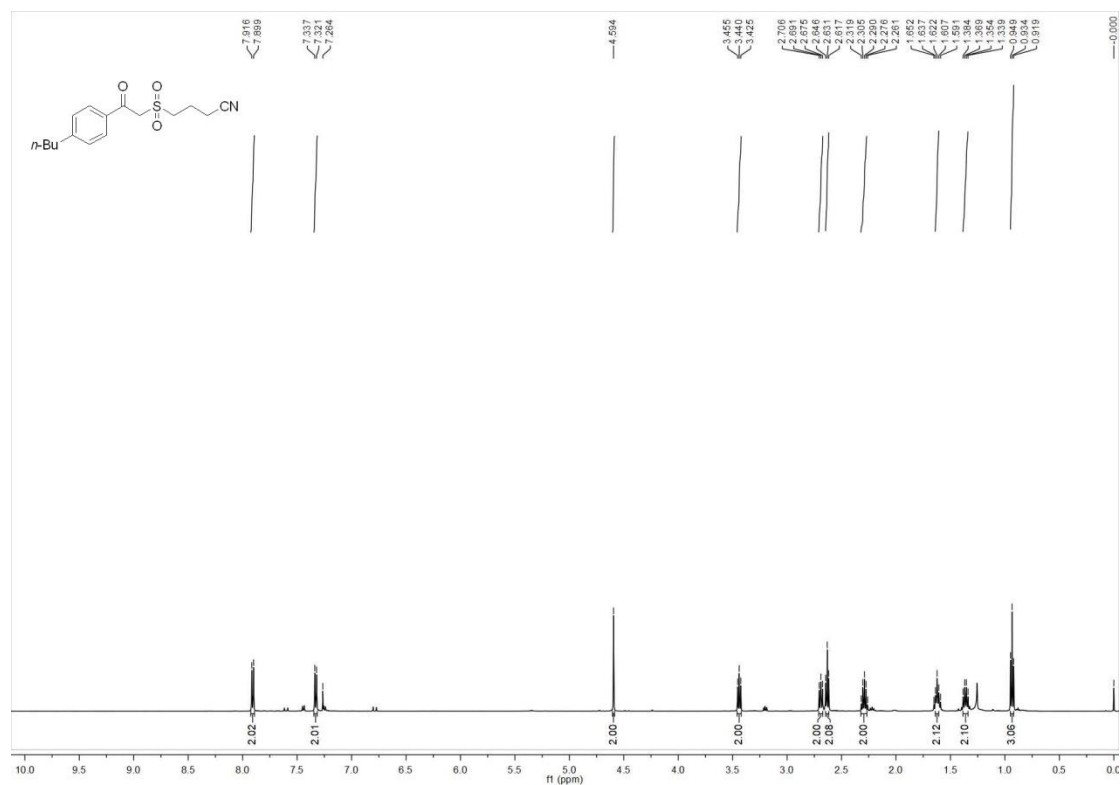

<sup>13</sup>C NMR-spectrum (126 MHz, CDCl<sub>3</sub>) of **4i**

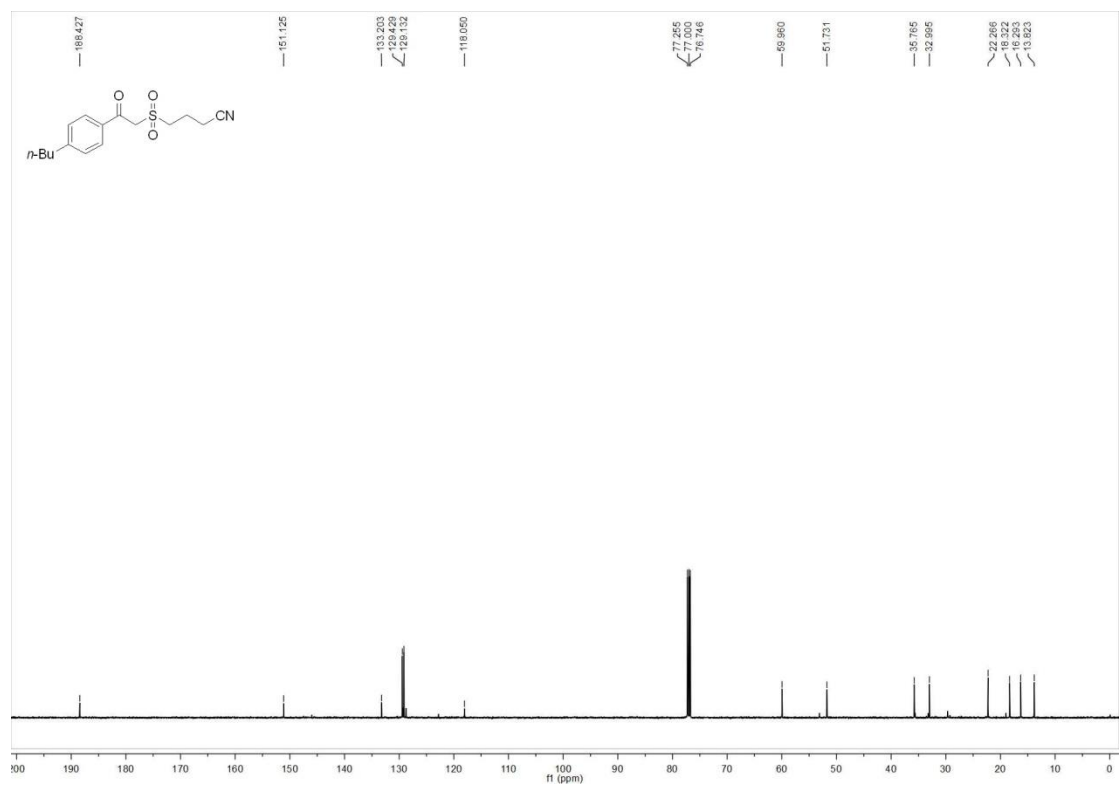



### 4-((2-(4-Chlorophenyl)-2-oxoethyl)sulfonyl)butanenitrile (4k)

<sup>1</sup>H NMR-spectrum (500 MHz, CDCl<sub>3</sub>) of 4k

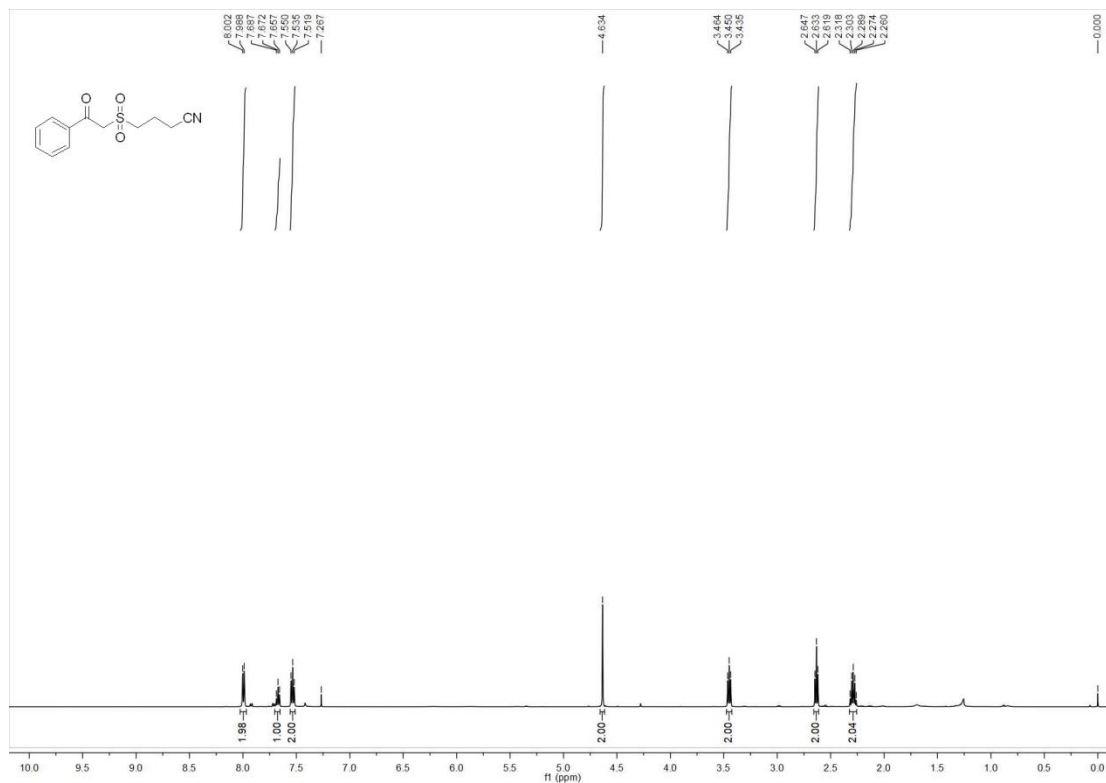

<sup>13</sup>C NMR-spectrum (126 MHz, CDCl<sub>3</sub>) of 4k

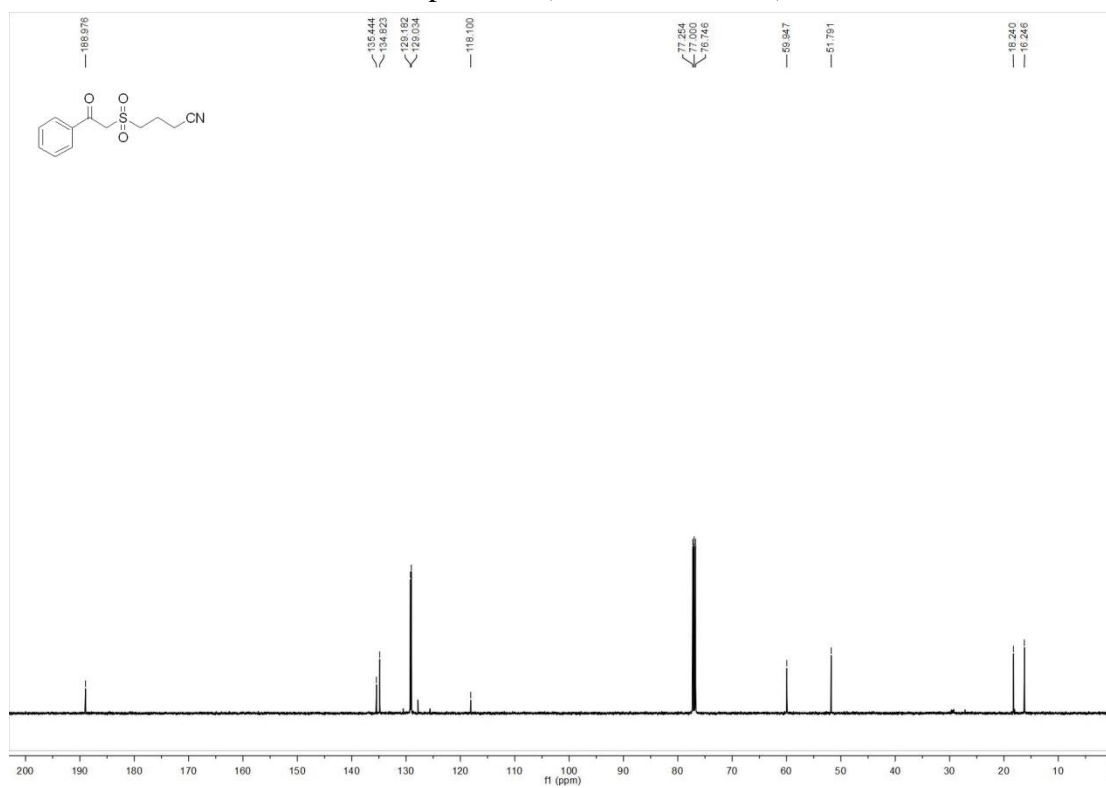

### 4-((2-(4-Fluorophenyl)-2-oxoethyl)sulfonyl)butanenitrile (4I)

<sup>1</sup>H NMR-spectrum (500 MHz, CDCl<sub>3</sub>) of 4I

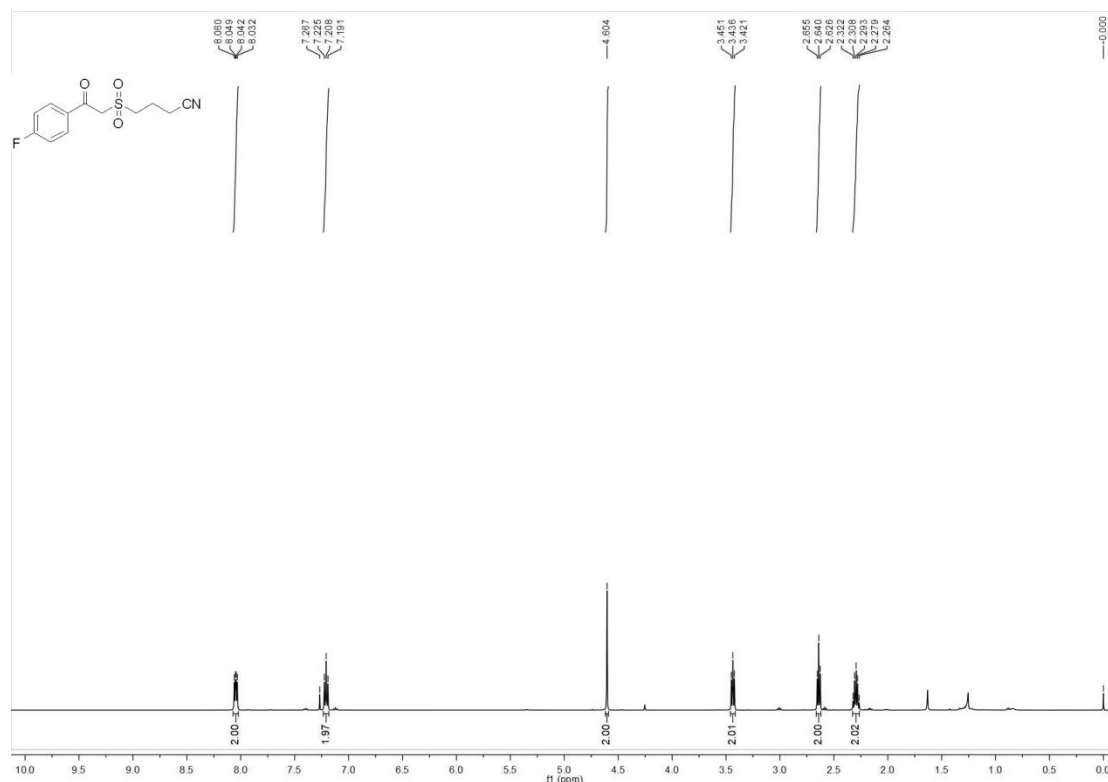

<sup>13</sup>C NMR-spectrum (126 MHz, CDCl<sub>3</sub>) of 4I

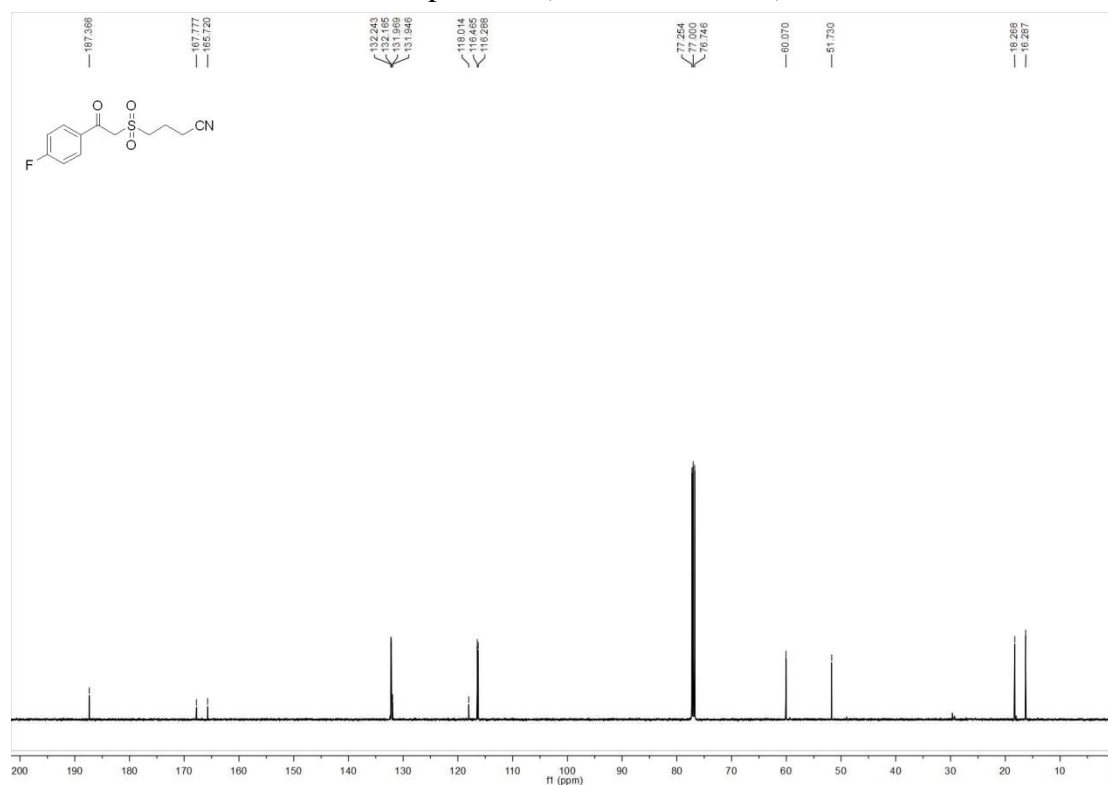

**$^{19}\text{F}$  NMR-spectrum (471 MHz,  $\text{CDCl}_3$ ) of **41****

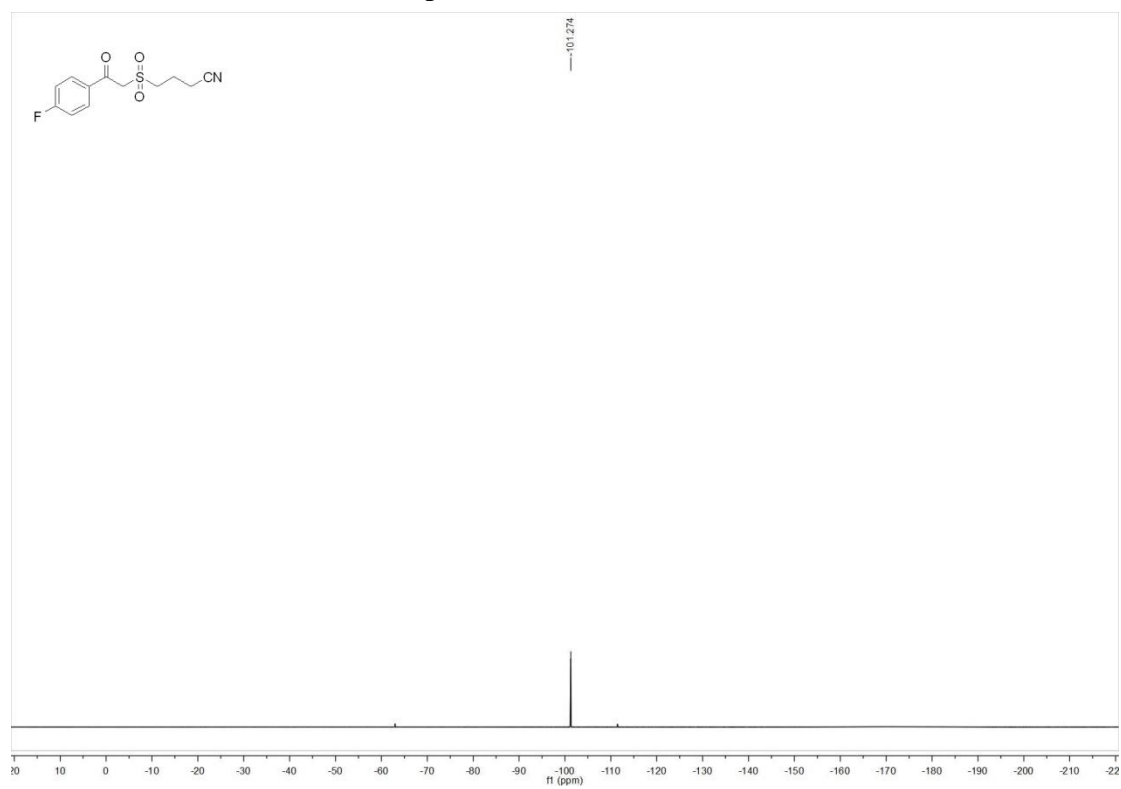

### 4-((2-(4-Bromophenyl)-2-oxoethyl)sulfonyl)butanenitrile (4m)

<sup>1</sup>H NMR-spectrum (400 MHz, CDCl<sub>3</sub>) of 4m

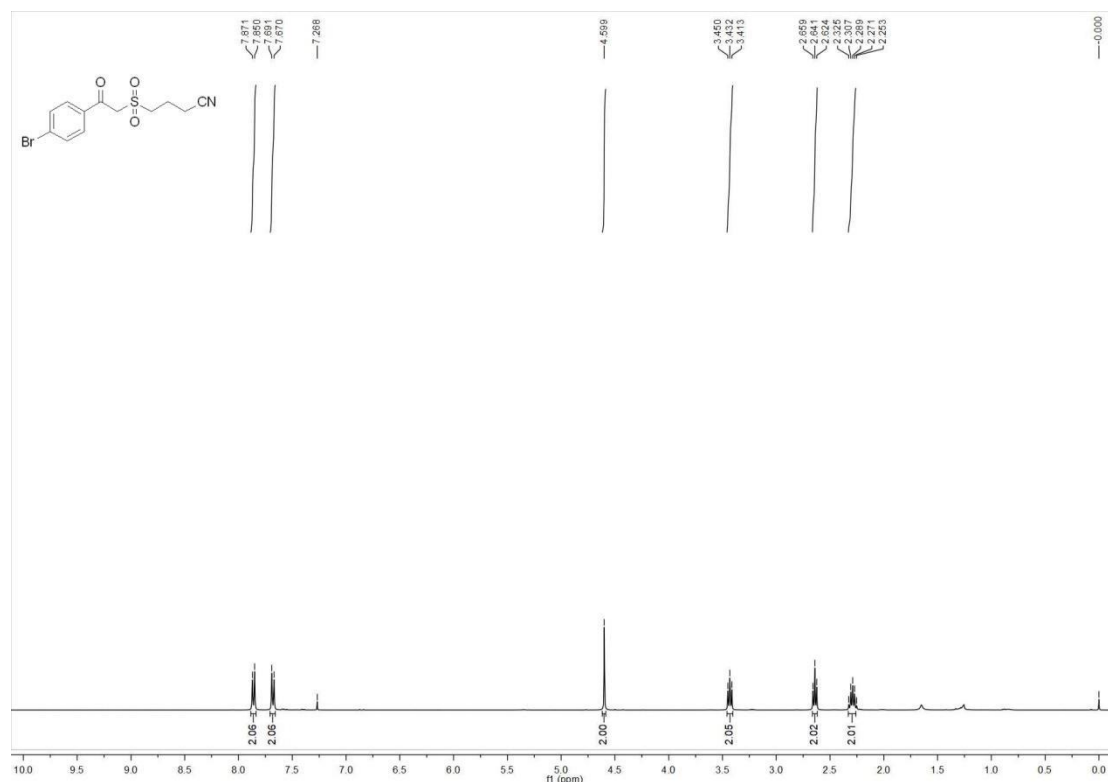

<sup>13</sup>C NMR-spectrum (101 MHz, CDCl<sub>3</sub>) of 4m

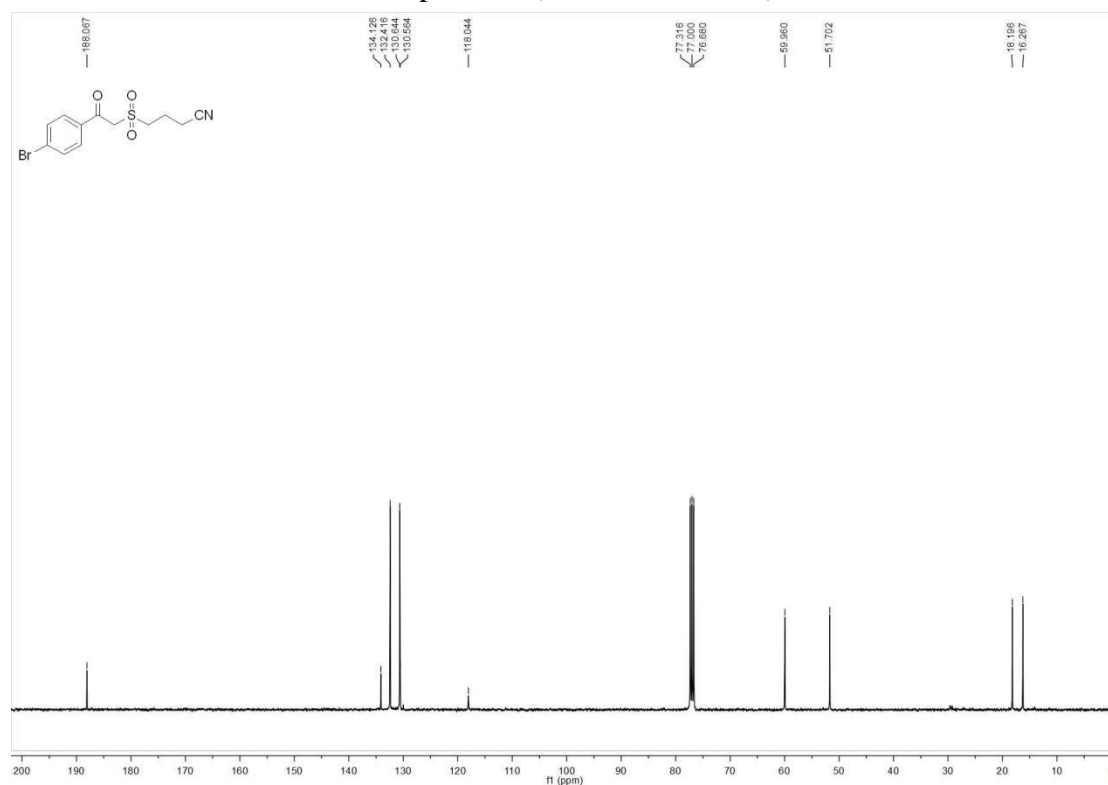



4-((2-oxo-2-(4-(Trifluoromethyl)phenyl)ethyl)sulfonyl)butanenitrile (**4n**)

<sup>1</sup>H NMR-spectrum (400 MHz, CDCl<sub>3</sub>) of **4n**

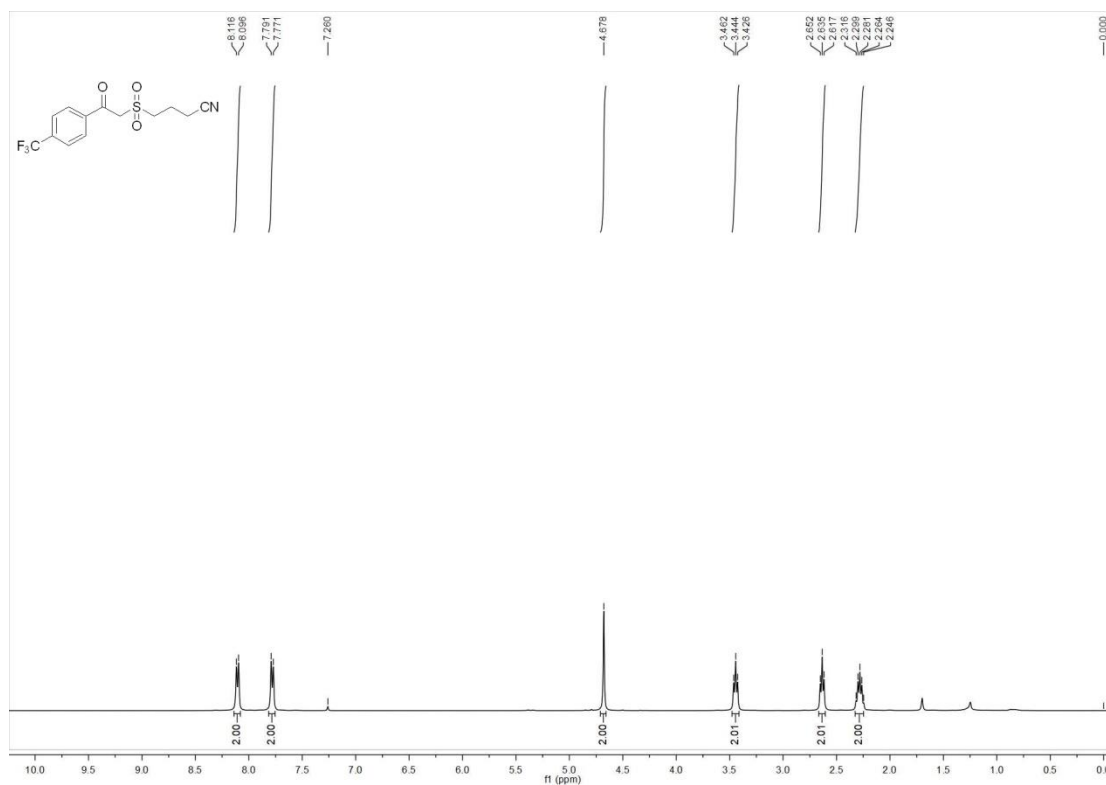

<sup>13</sup>C NMR-spectrum (101 MHz, CDCl<sub>3</sub>) of **4n**

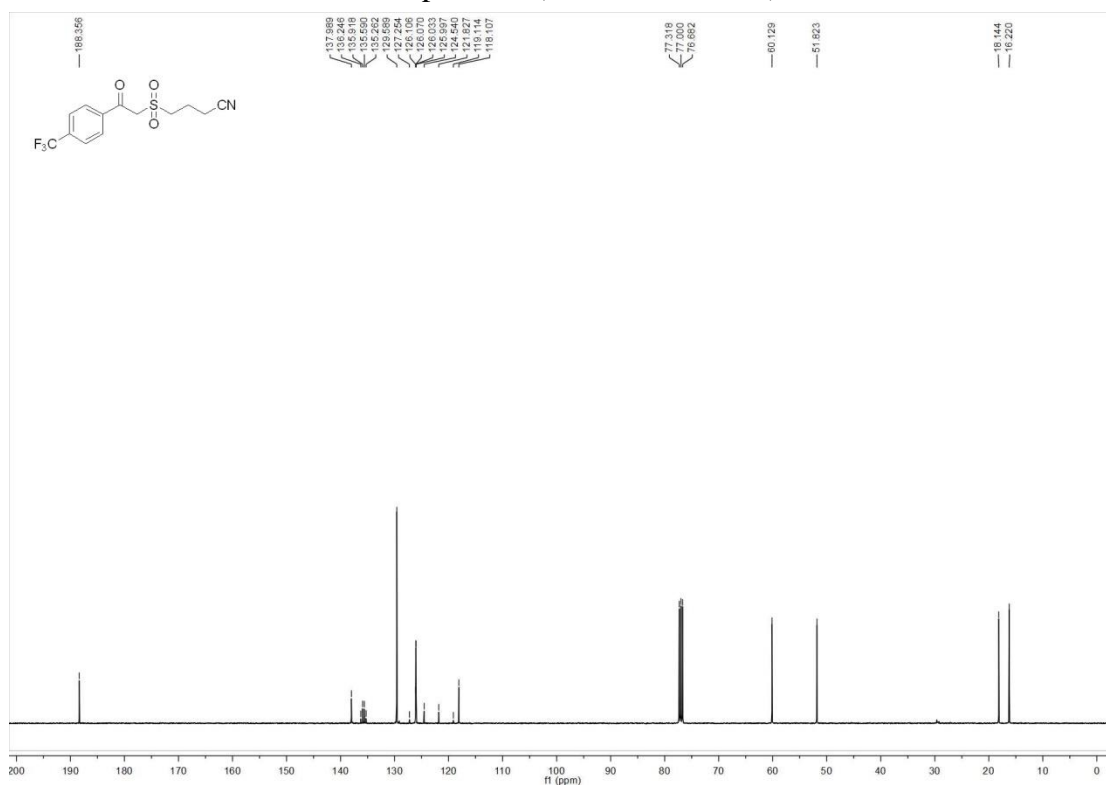

**<sup>19</sup>F NMR-spectrum (376 MHz, CDCl<sub>3</sub>) of 4n**

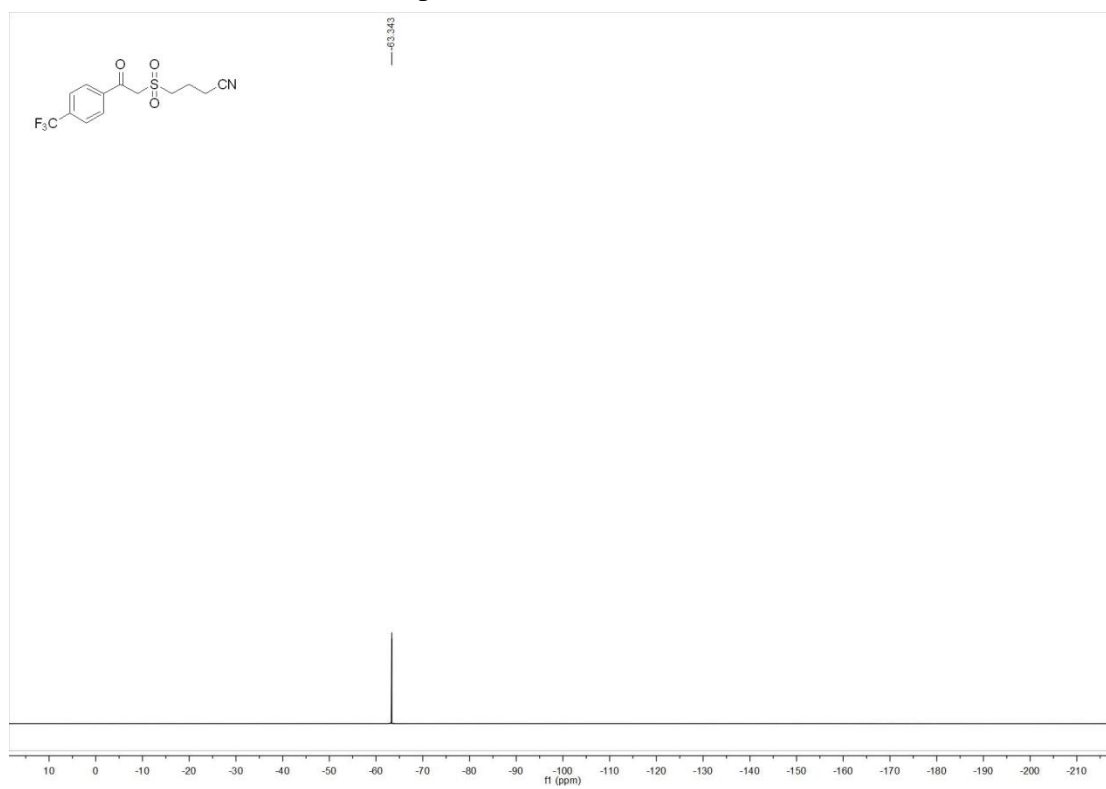

### 4-(2-((3-Cyanopropyl)sulfonyl)acetyl)benzonitrile (4o)

<sup>1</sup>H NMR-spectrum (400 MHz, CDCl<sub>3</sub>) of 4o

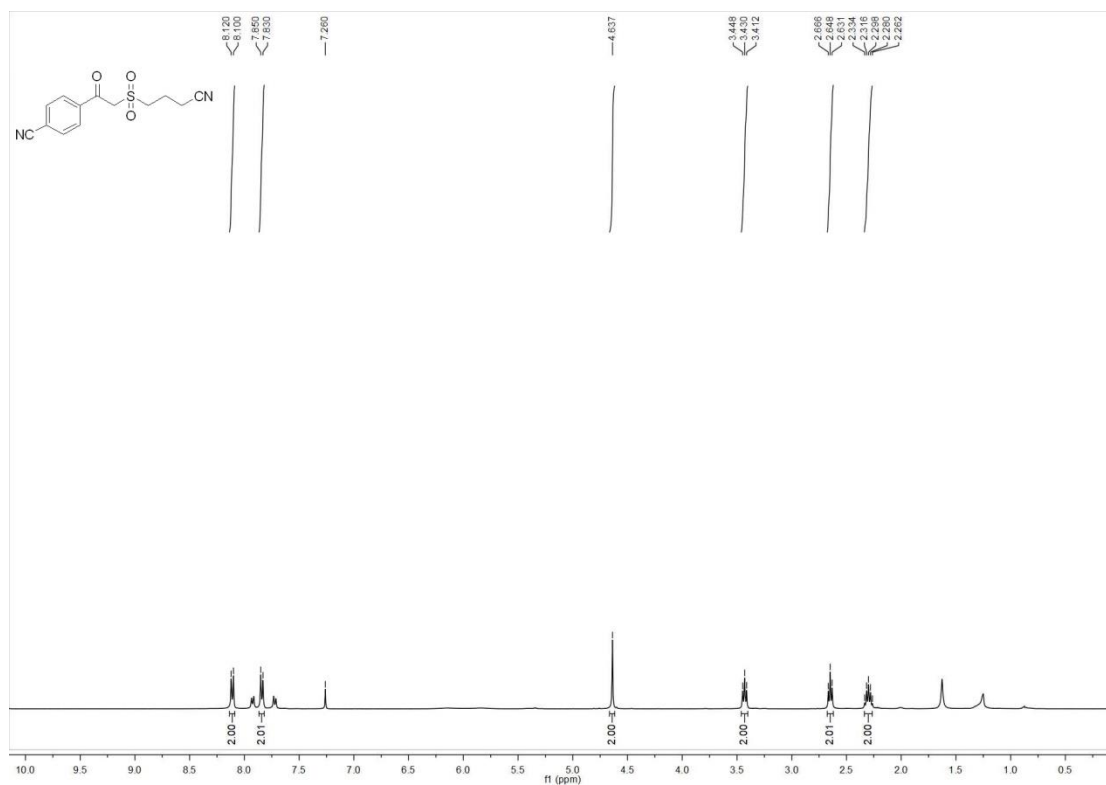

<sup>13</sup>C NMR-spectrum (101 MHz, CDCl<sub>3</sub>) of 4o

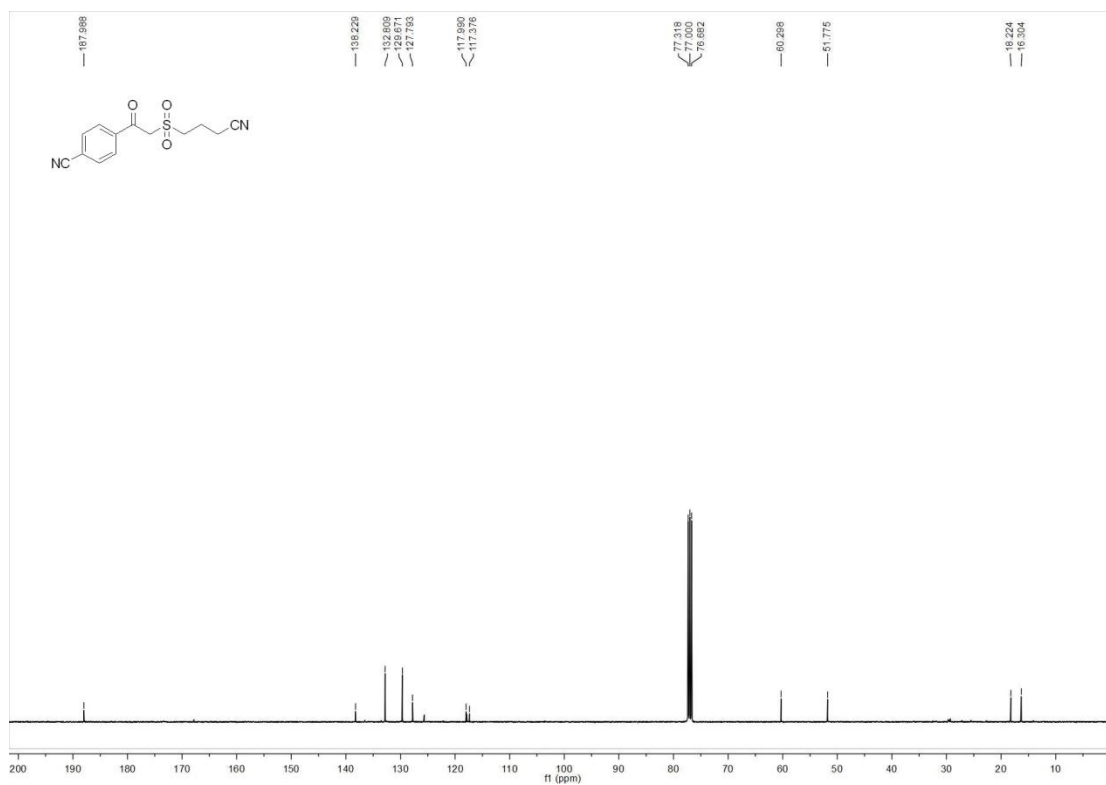

# Methyl 4-((3-cyanopropyl)sulfonyl)acetylbenzoate (4p)

## <sup>1</sup>H NMR-spectrum (400 MHz, CDCl<sub>3</sub>) of 4p

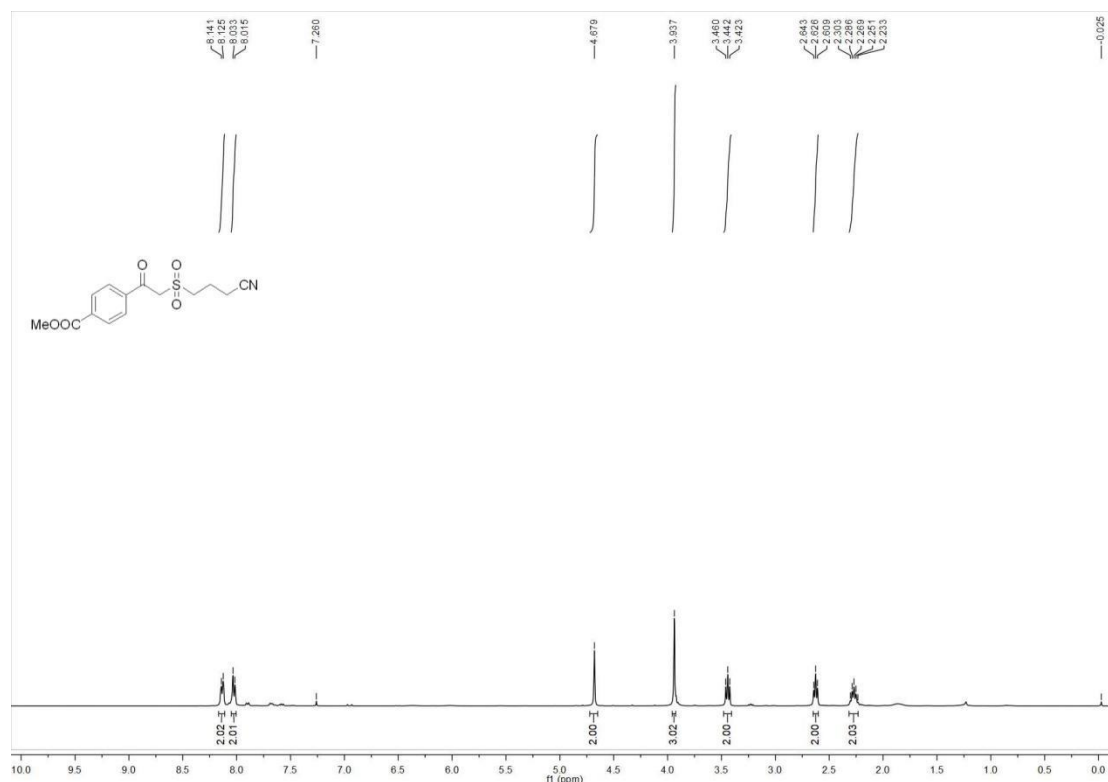

## <sup>13</sup>C NMR-spectrum (101 MHz, CDCl<sub>3</sub>) of 4p

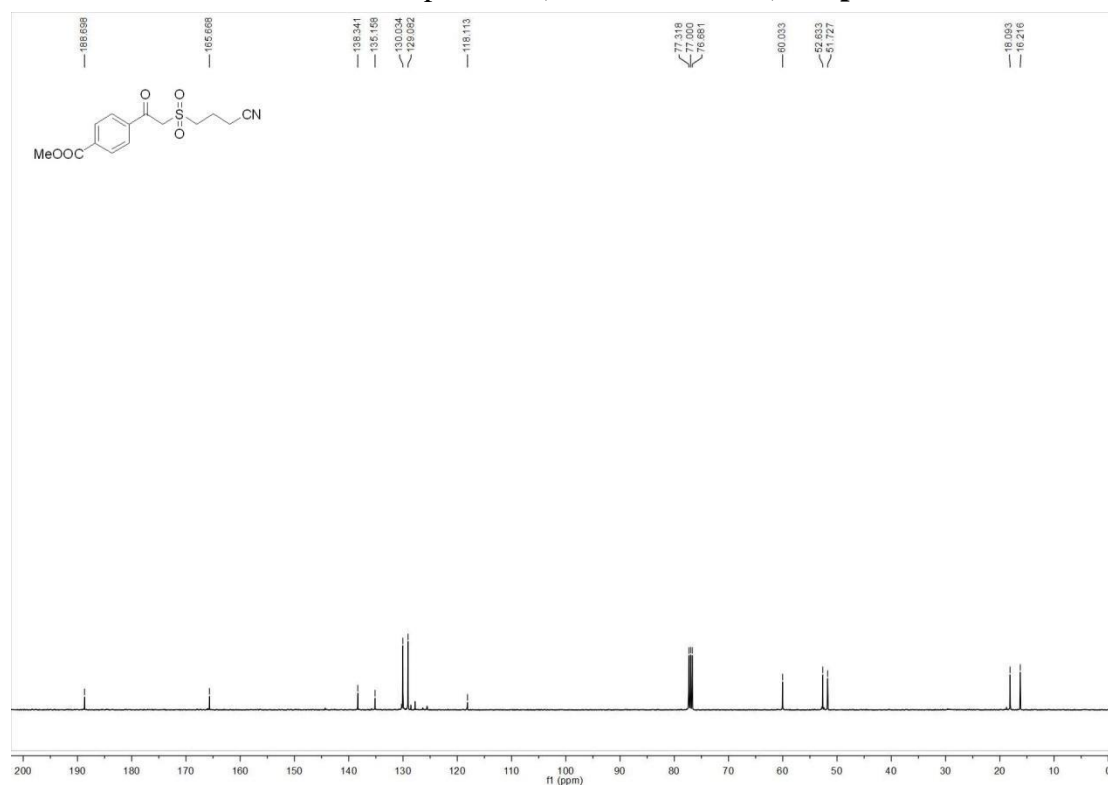

### 4-((2-(4-Nitrophenyl)-2-oxoethyl)sulfonyl)butanenitrile (4q)

$^1\text{H}$  NMR-spectrum (400 MHz, DMSO-d<sub>6</sub>) of 4q

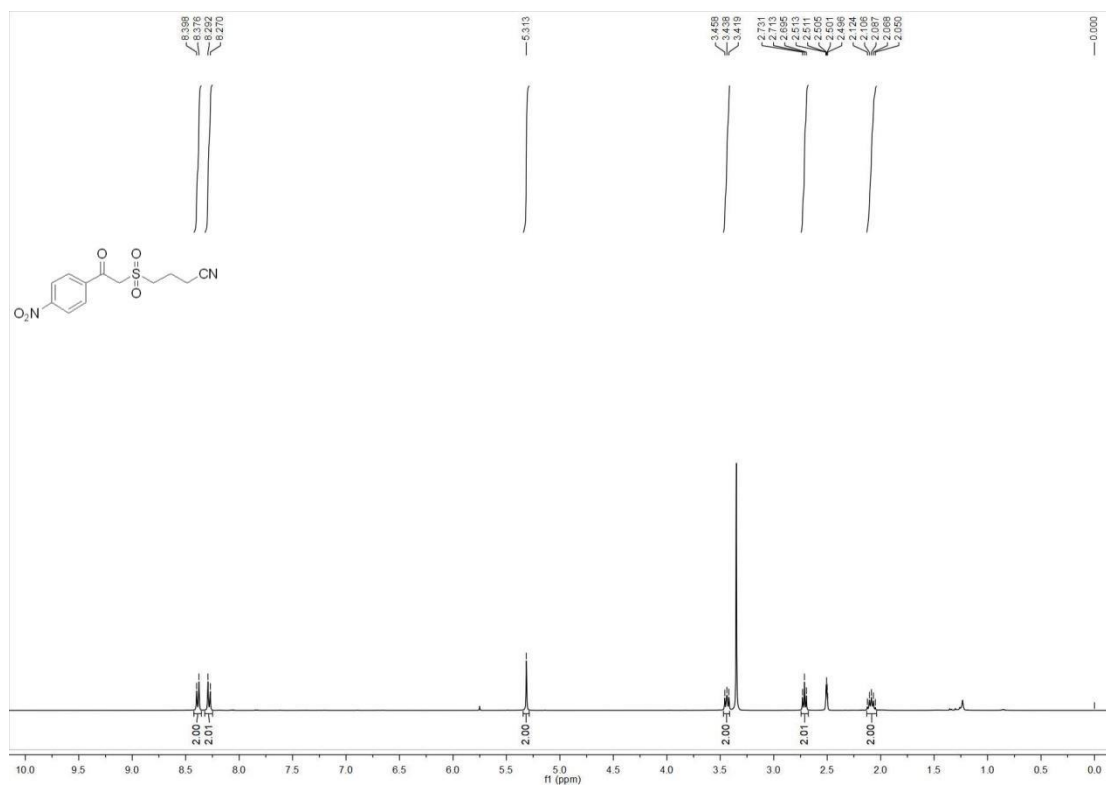

$^{13}\text{C}$  NMR-spectrum (101 MHz, DMSO-d<sub>6</sub>) of 4q

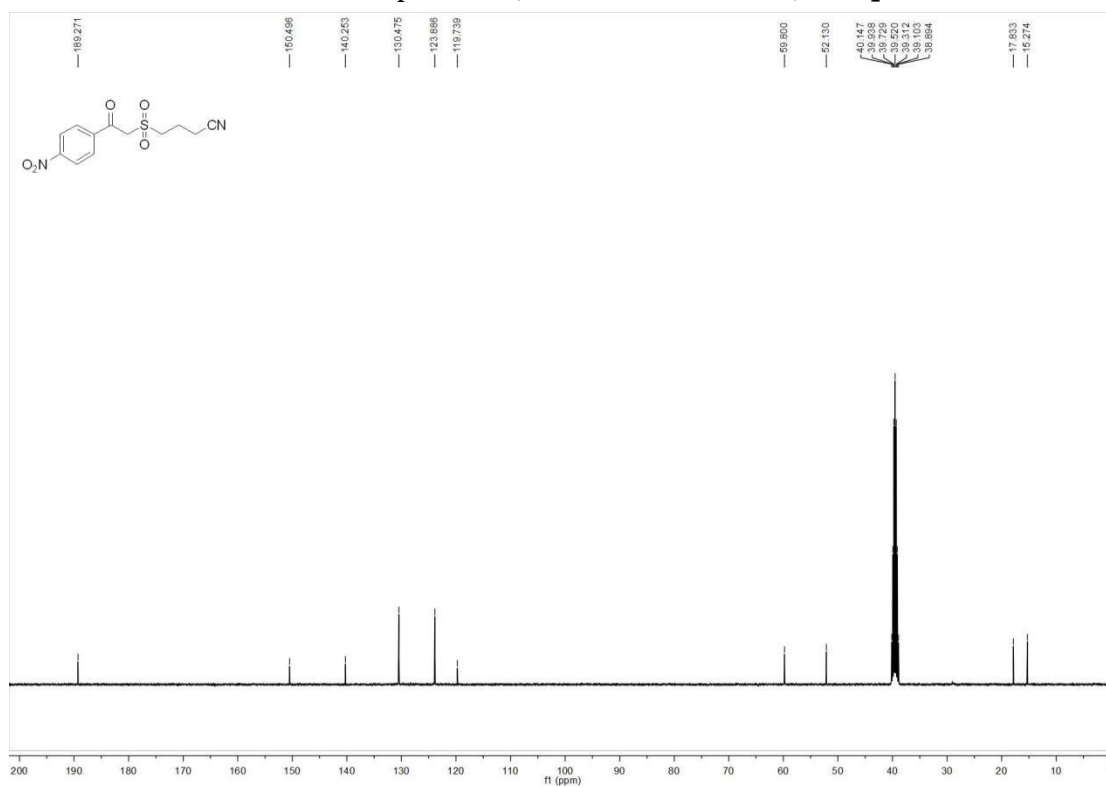

### 4-((2-oxo-2-(*m*-Tolyl)ethyl)sulfonyl)butanenitrile (**4r**)

<sup>1</sup>H NMR-spectrum (400 MHz, CDCl<sub>3</sub>) of **4r**

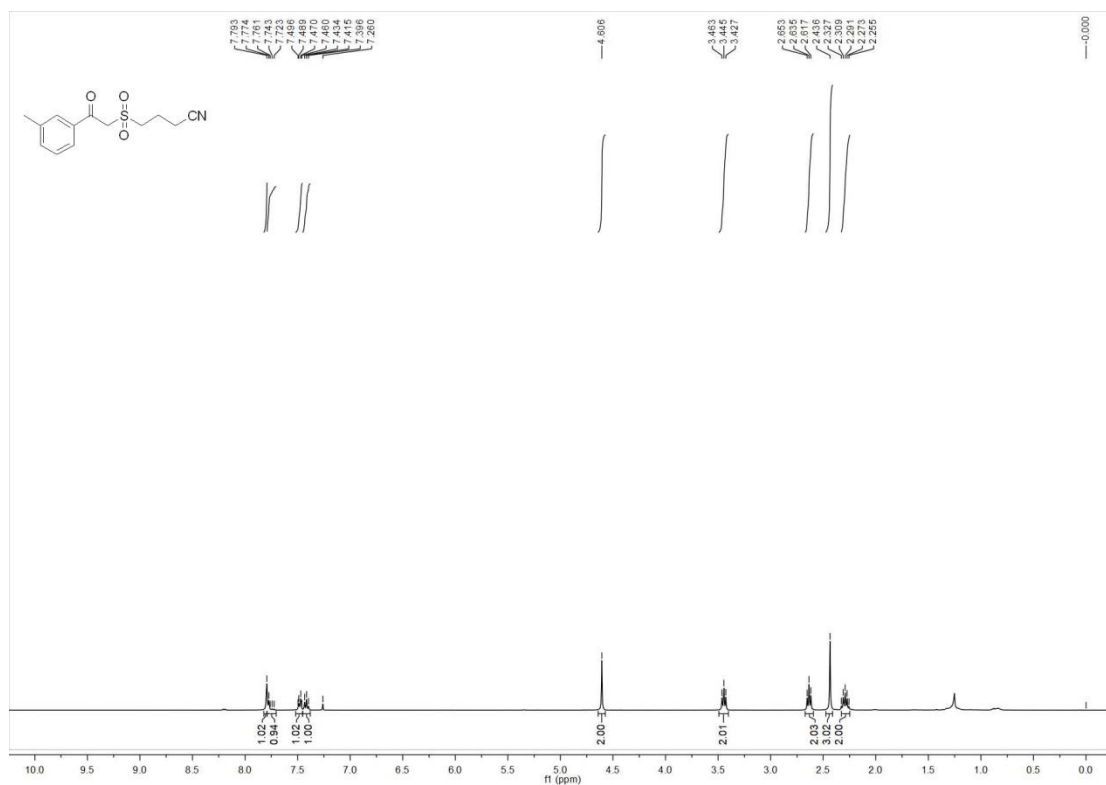

<sup>13</sup>C NMR-spectrum (101 MHz, CDCl<sub>3</sub>) of **4r**

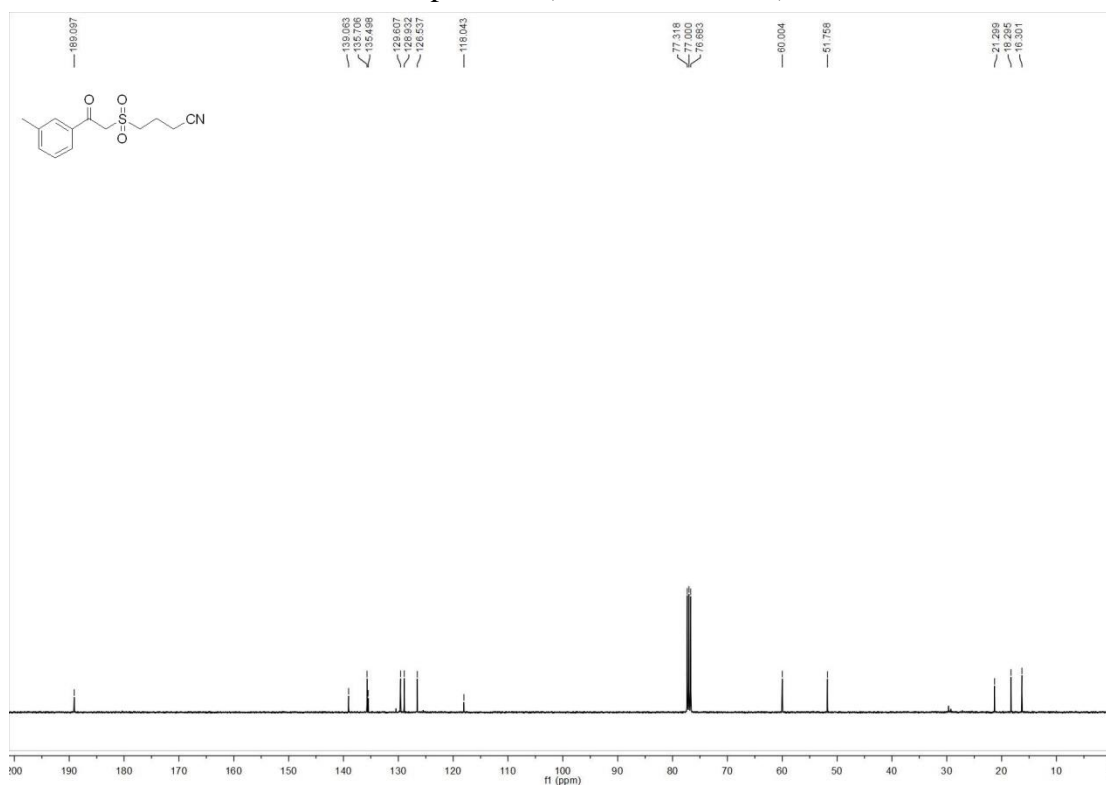

### 4-((2-(Naphthalen-2-yl)-2-oxoethyl)sulfonyl)butanenitrile (4s)

<sup>1</sup>H NMR-spectrum (400 MHz, CDCl<sub>3</sub>) of 4s

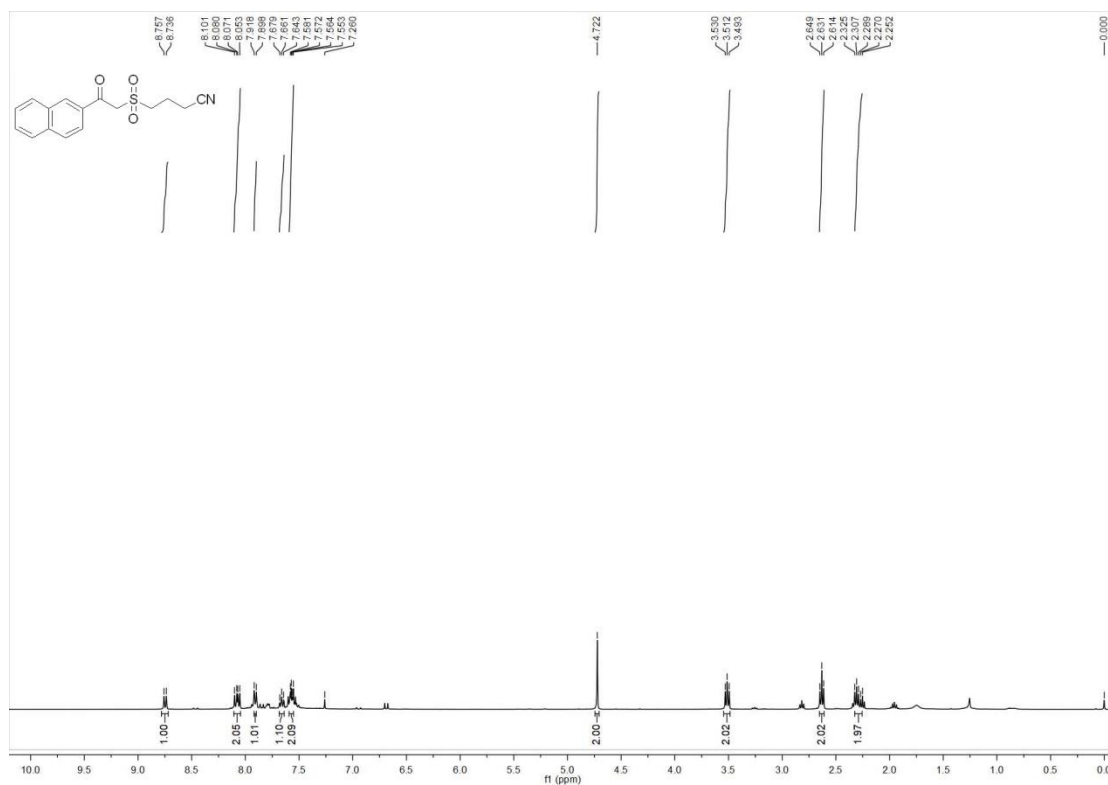

<sup>13</sup>C NMR-spectrum (101 MHz, CDCl<sub>3</sub>) of 4s

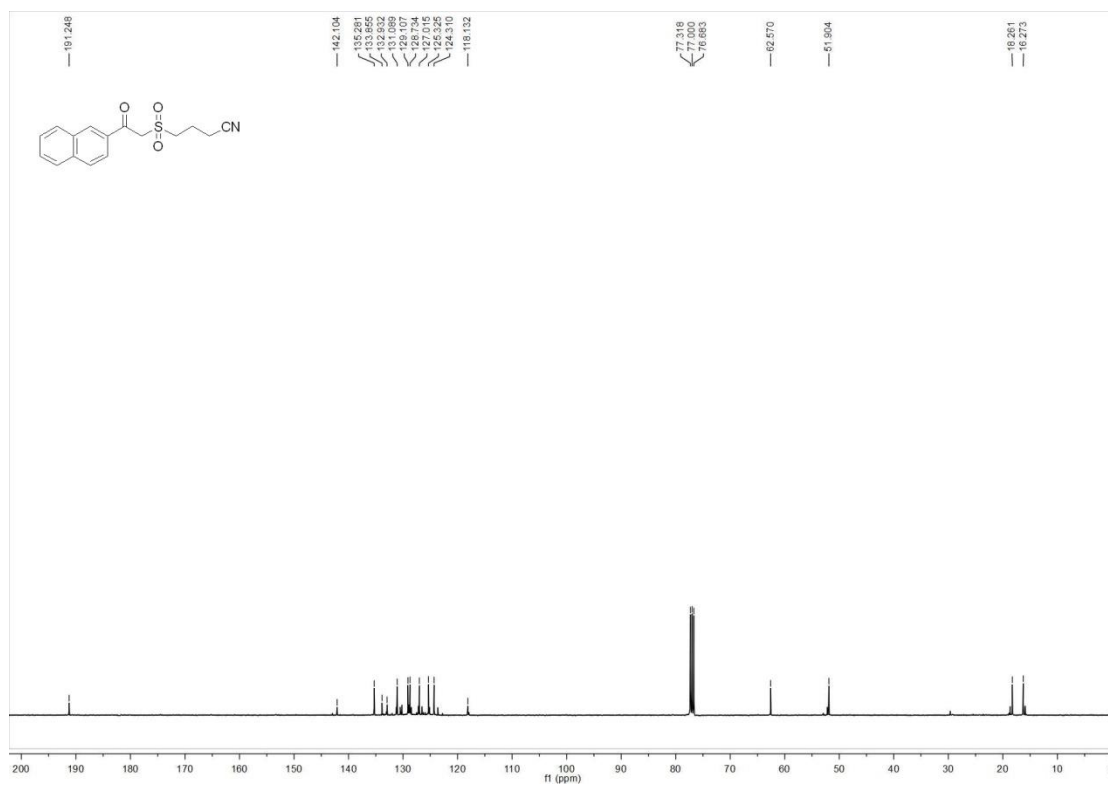

4-((2-oxo-2-(Thiophen-2-yl)ethyl)sulfonyl)butanenitrile (4t)

<sup>1</sup>H NMR-spectrum (400 MHz, CDCl<sub>3</sub>) of 4t

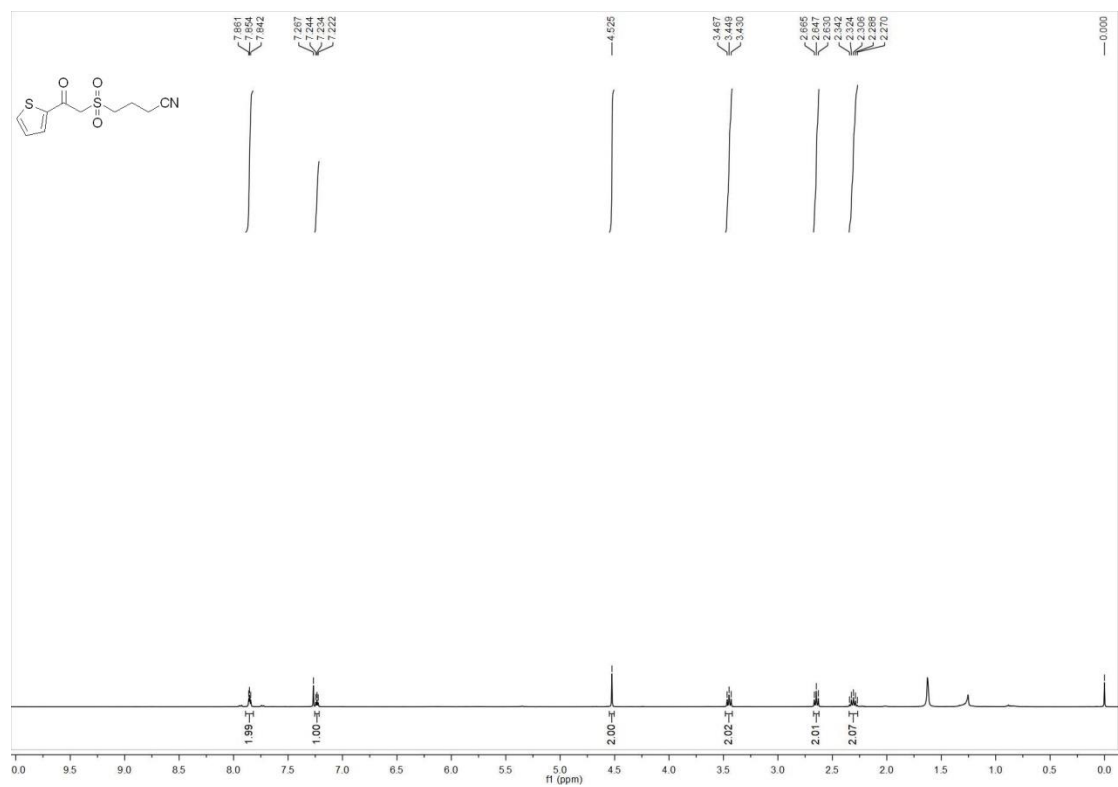

<sup>13</sup>C NMR-spectrum (101 MHz, CDCl<sub>3</sub>) of 4t

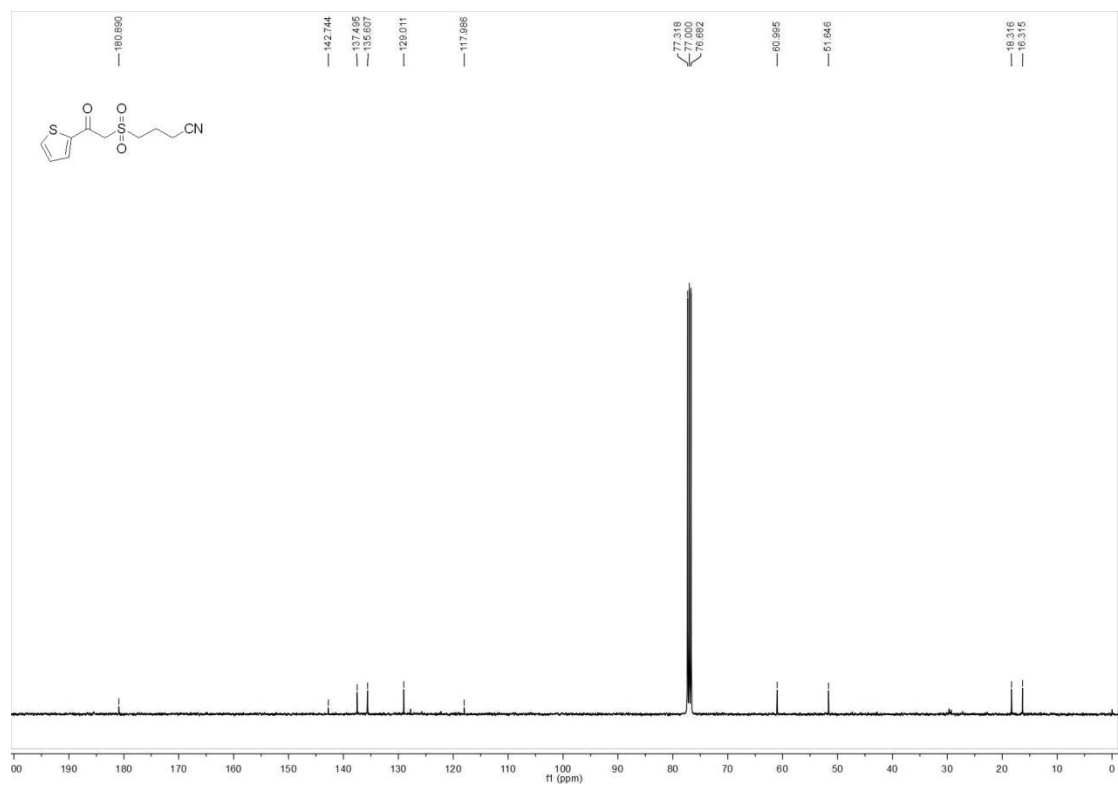



**4-((2-Oxoocetyl)sulfonyl)butanenitrile (4u)**  
<sup>1</sup>H NMR-spectrum (400 MHz, CDCl<sub>3</sub>) of **4u**

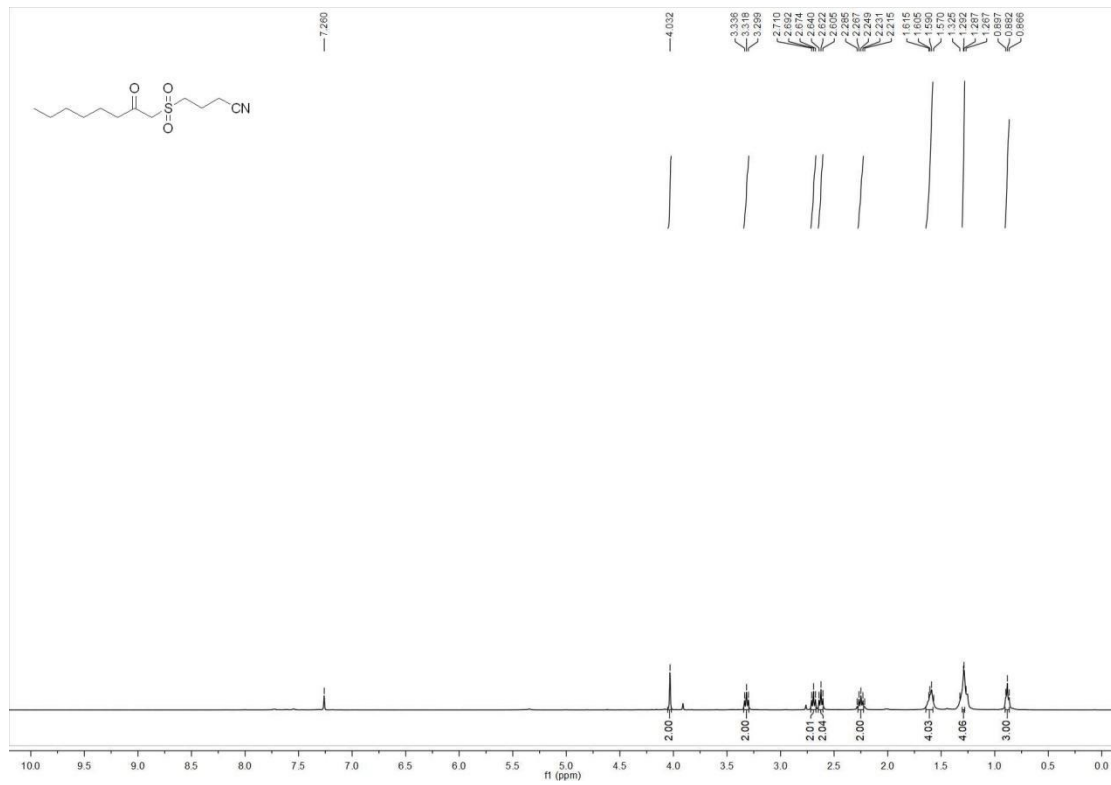

<sup>13</sup>C NMR-spectrum (101 MHz, CDCl<sub>3</sub>) of **4u**

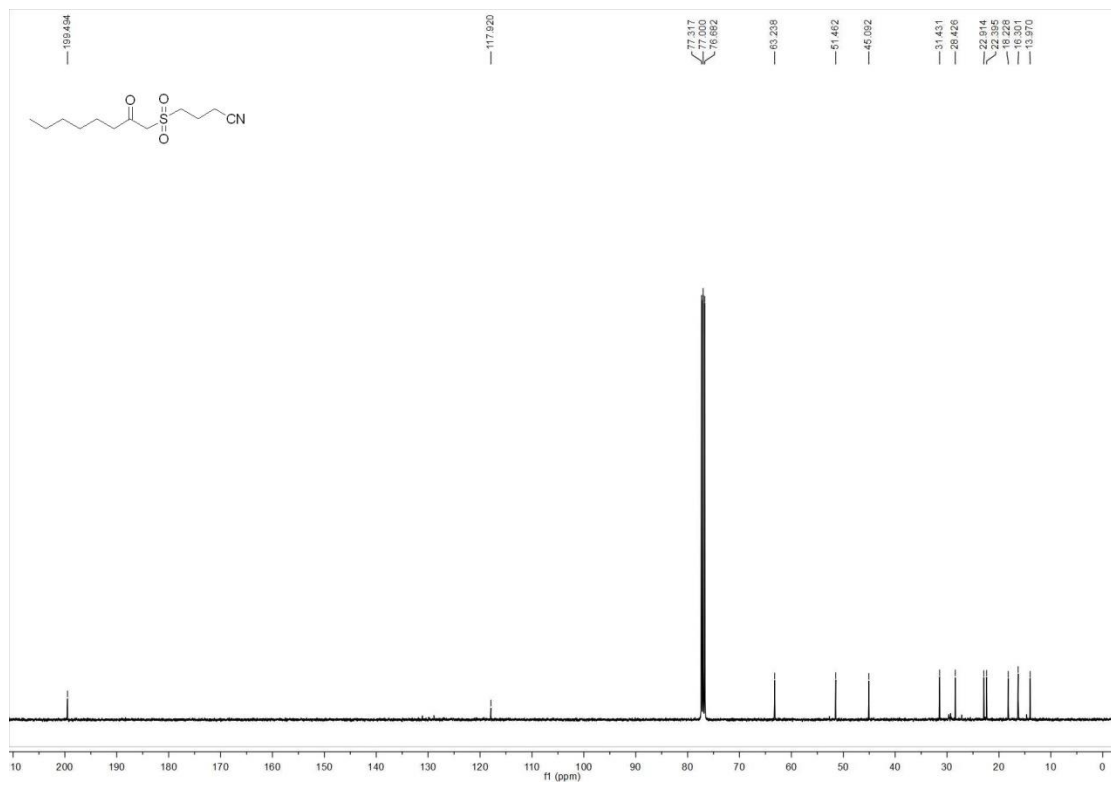

### 4-((2-Oxododecyl)sulfonyl)butanenitrile (**4v**)

<sup>1</sup>H NMR-spectrum (400 MHz, CDCl<sub>3</sub>) of **4v**

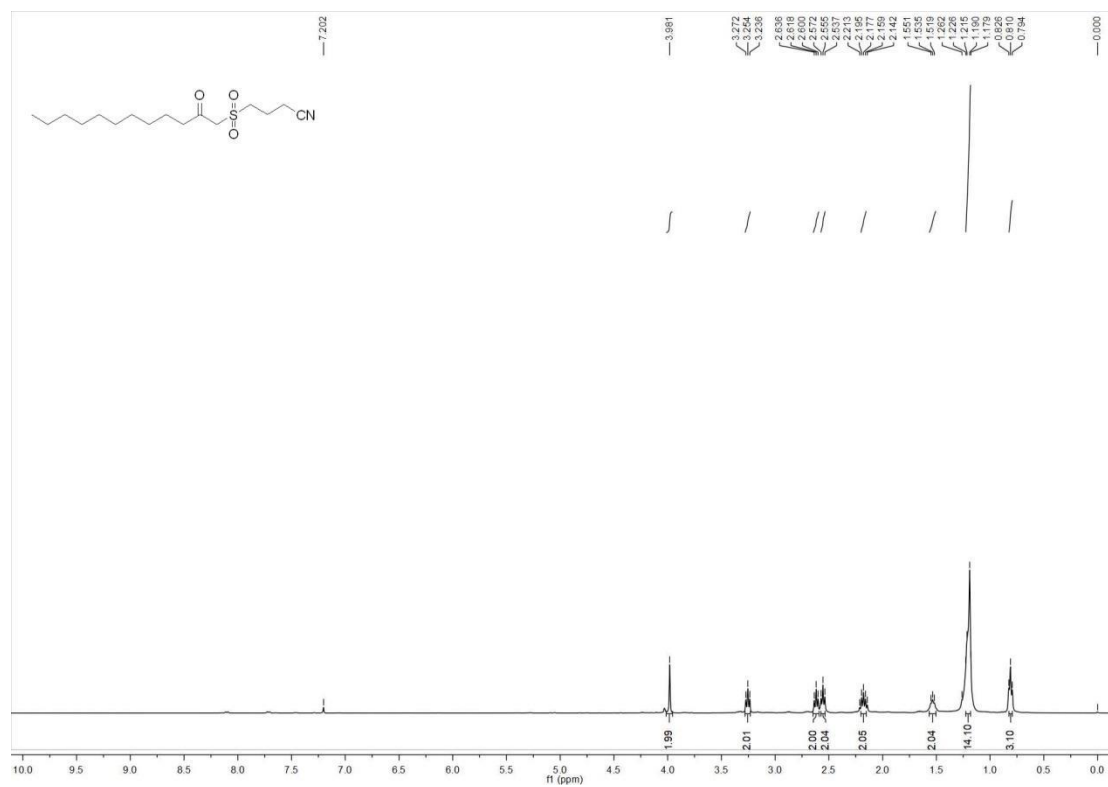

<sup>13</sup>C NMR-spectrum (101 MHz, CDCl<sub>3</sub>) of **4v**

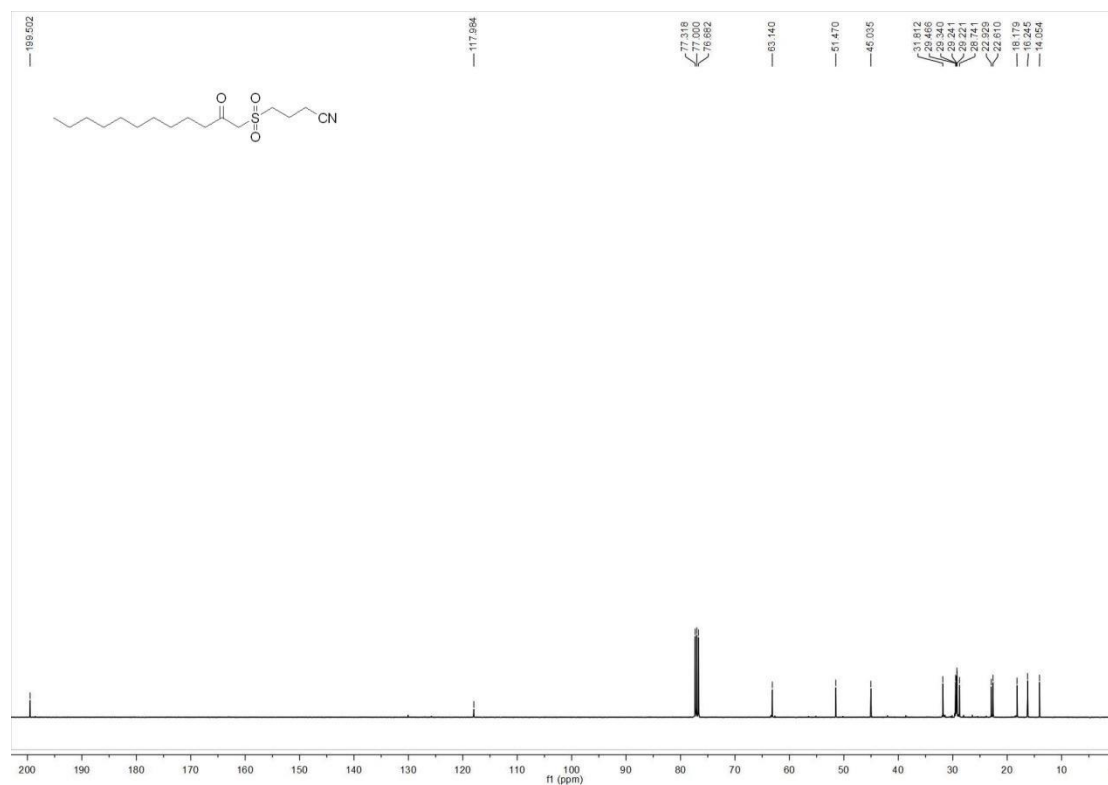

### 4-((2-oxo-4-Phenylbutyl)sulfonyl)butanenitrile (4w)

<sup>1</sup>H NMR-spectrum (400 MHz, CDCl<sub>3</sub>) of 4w

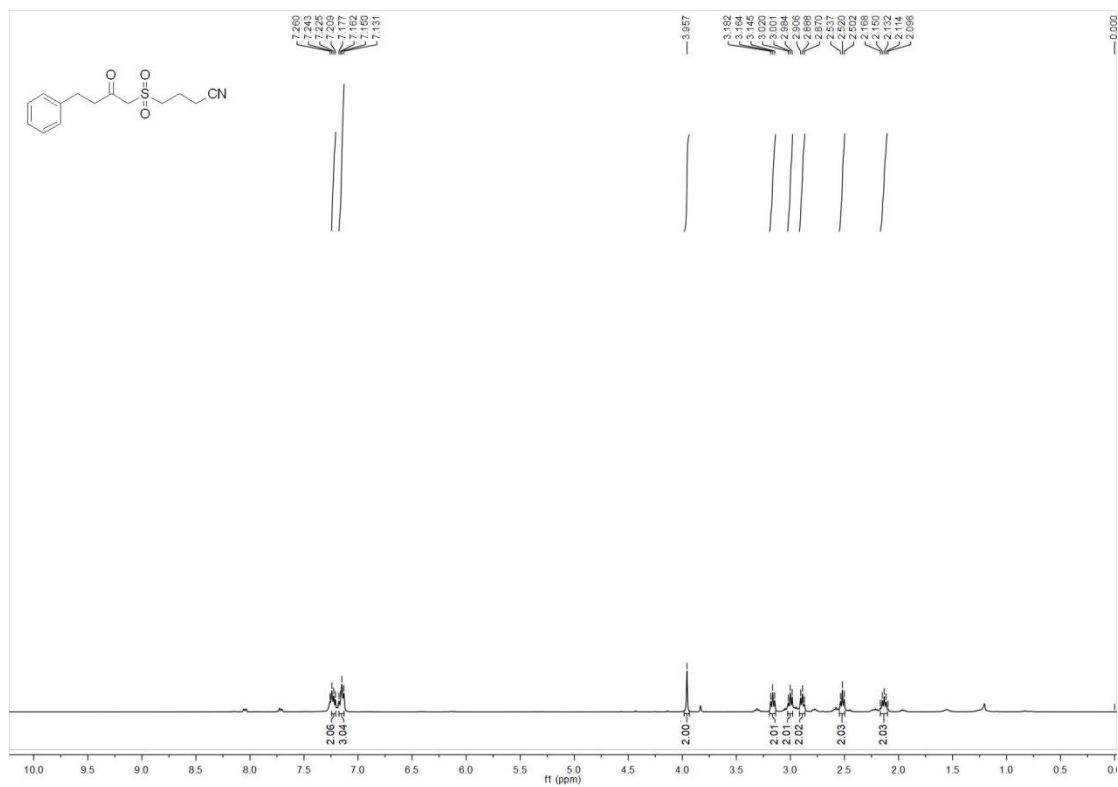

<sup>13</sup>C NMR-spectrum (101 MHz, CDCl<sub>3</sub>) of 4w

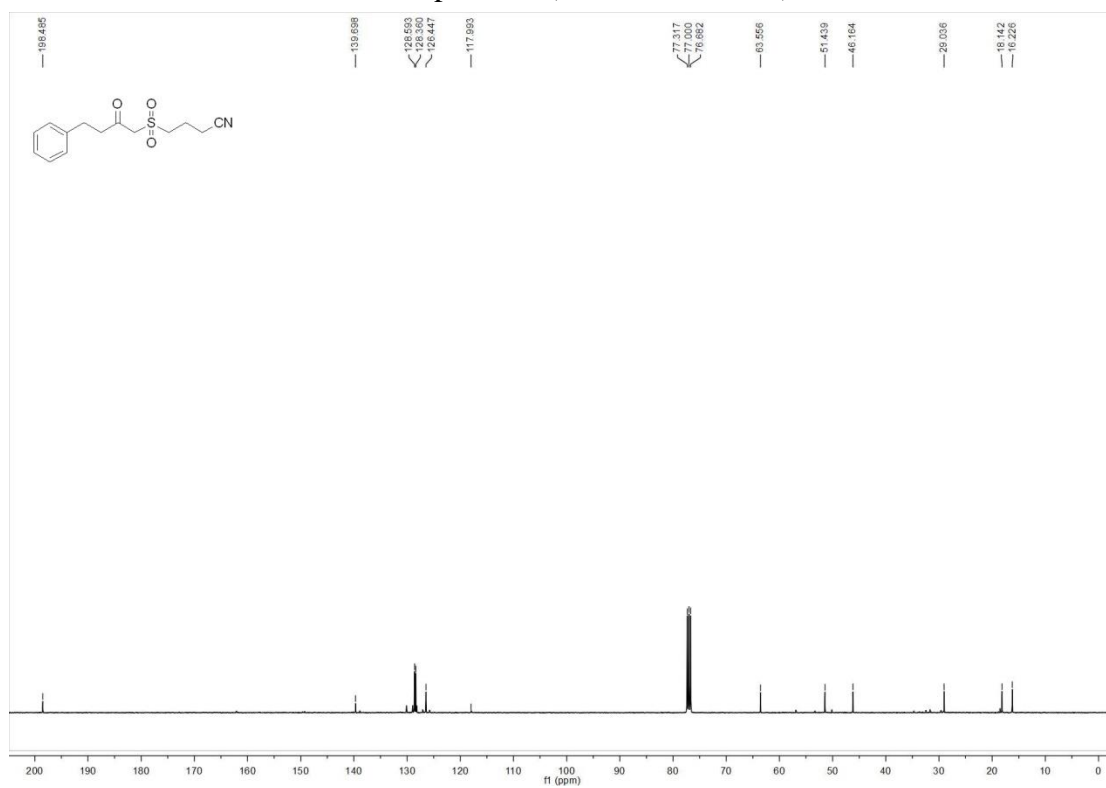

### 4-((2-oxo-3-Phenoxypropyl)sulfonyl)butanenitrile (4x)

<sup>1</sup>H NMR-spectrum (400 MHz, CDCl<sub>3</sub>) of 4x

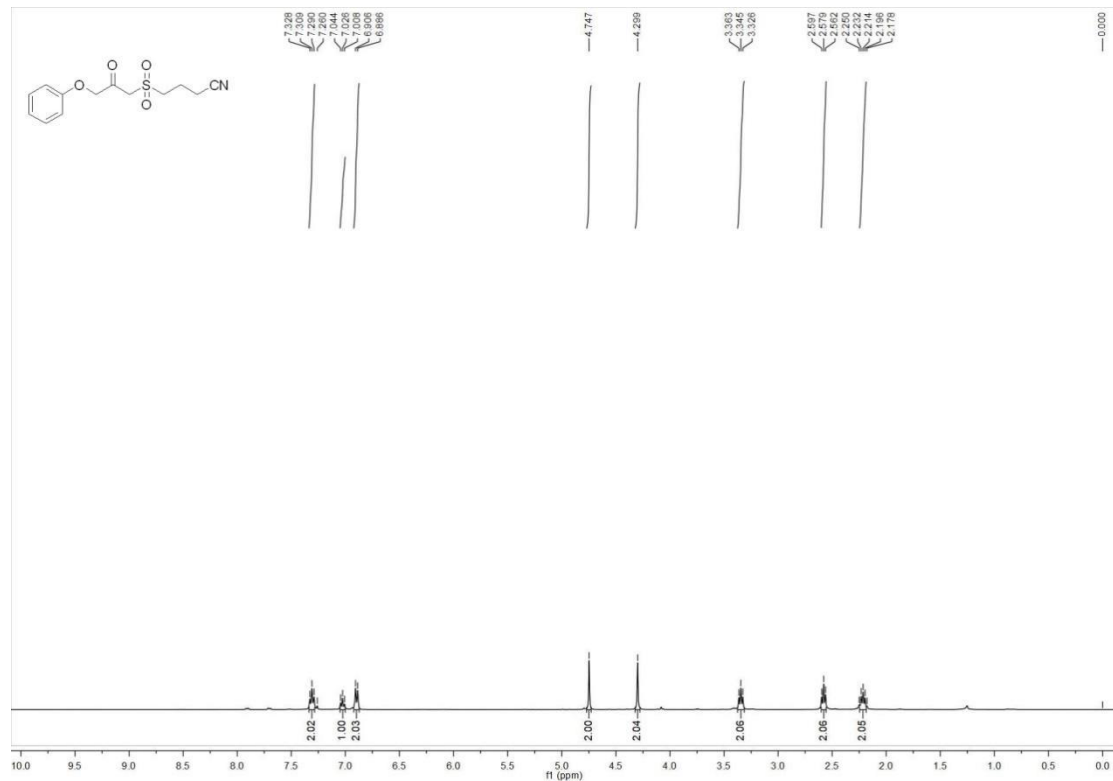

<sup>13</sup>C NMR-spectrum (101 MHz, CDCl<sub>3</sub>) of 4x

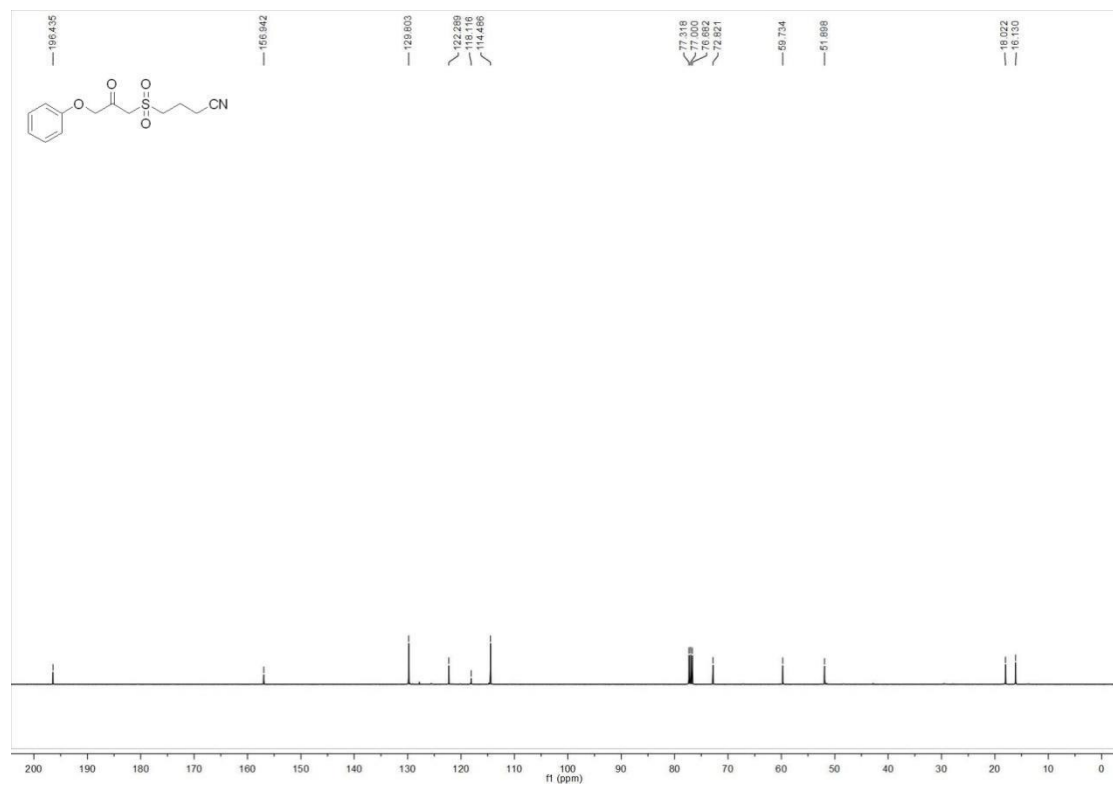

### 4-((2-(4-Bromophenyl)-2-hydroxyethyl)sulfonyl)butanenitrile (7a)

<sup>1</sup>H NMR-spectrum (500 MHz, CDCl<sub>3</sub>) of 7a

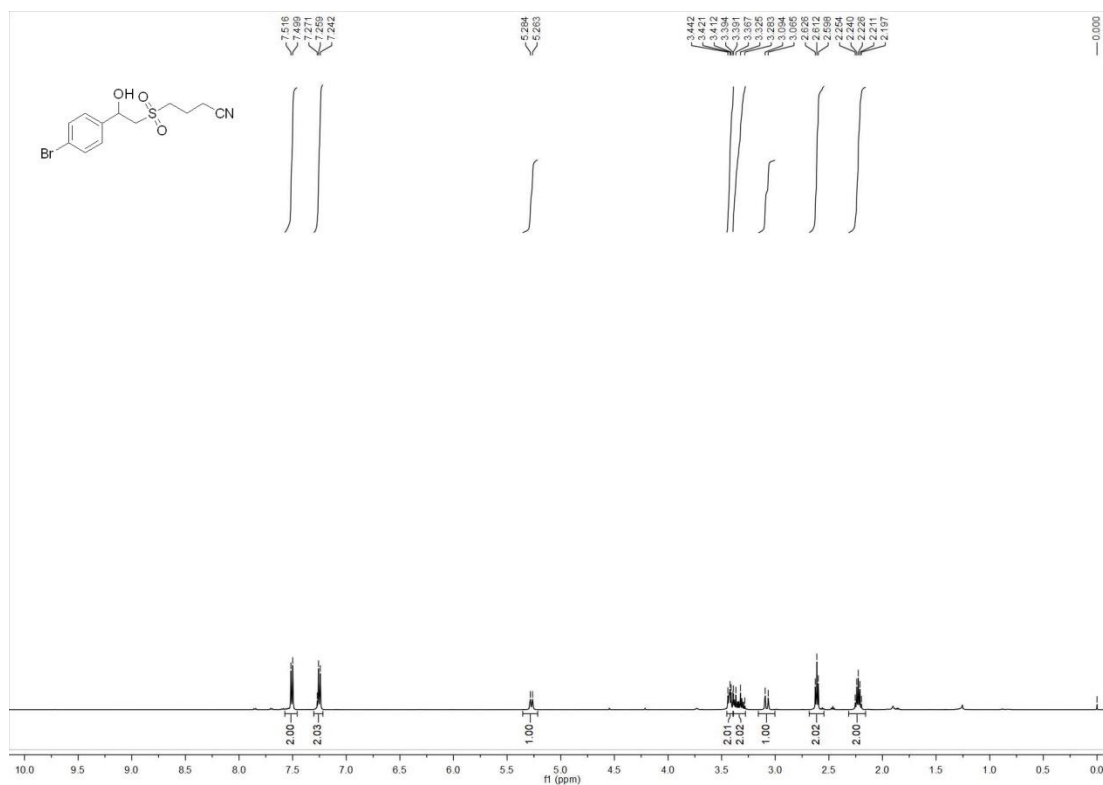

<sup>13</sup>C NMR-spectrum (126 MHz, CDCl<sub>3</sub>) of 7a

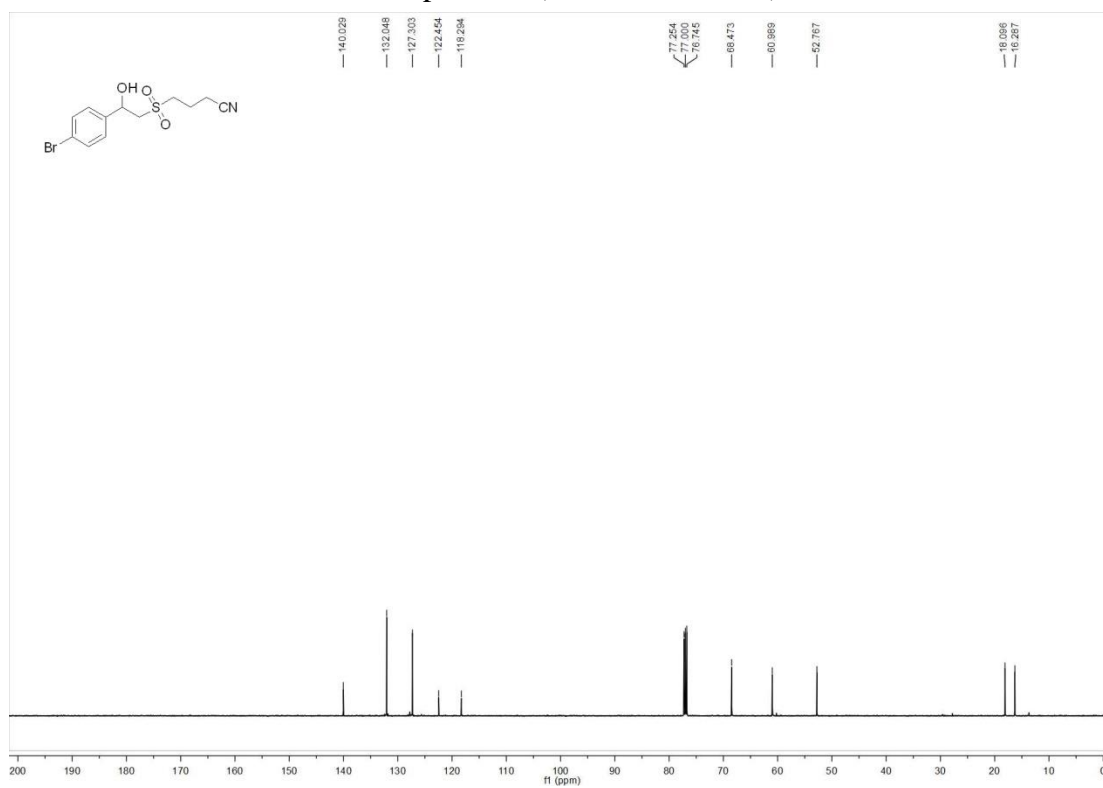

**5-(3,5-di-*tert*-Butyl-4-oxocyclohexa-2,5-dien-1-yl)pentanenitrile (9a)**

**<sup>1</sup>H NMR-spectrum (400 MHz, CDCl<sub>3</sub>) of 9a**

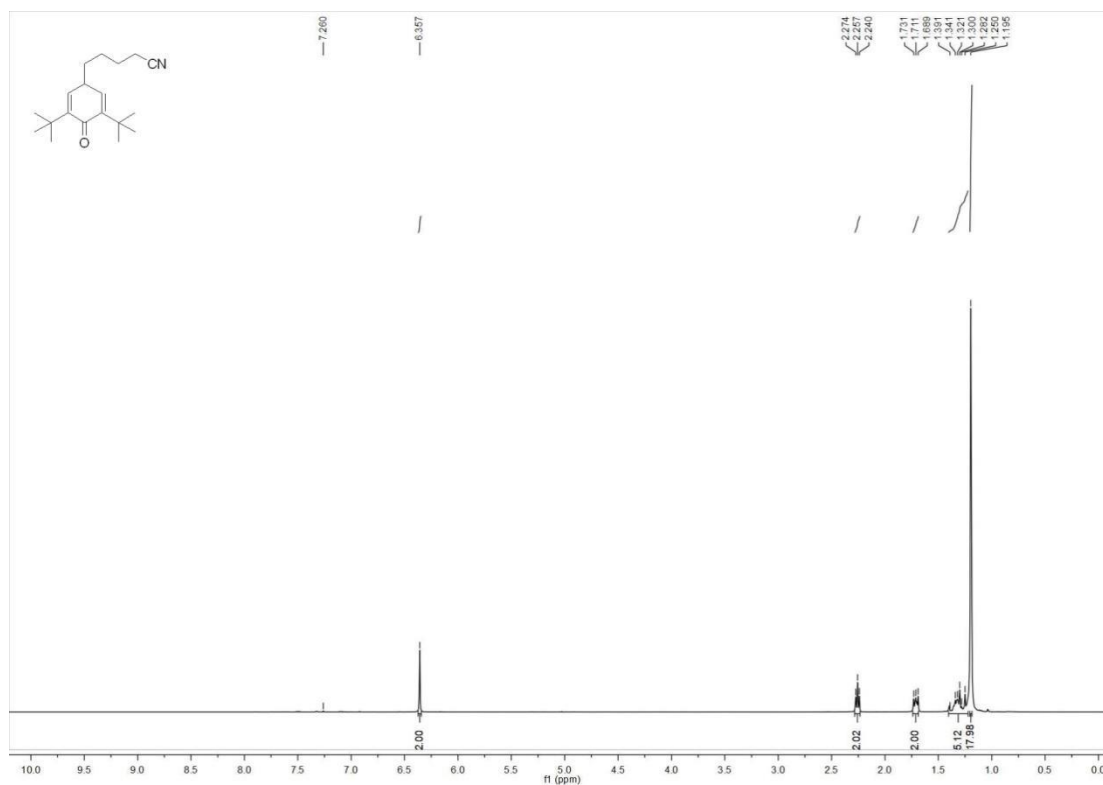

**<sup>13</sup>C NMR-spectrum (101 MHz, CDCl<sub>3</sub>) of 9a**

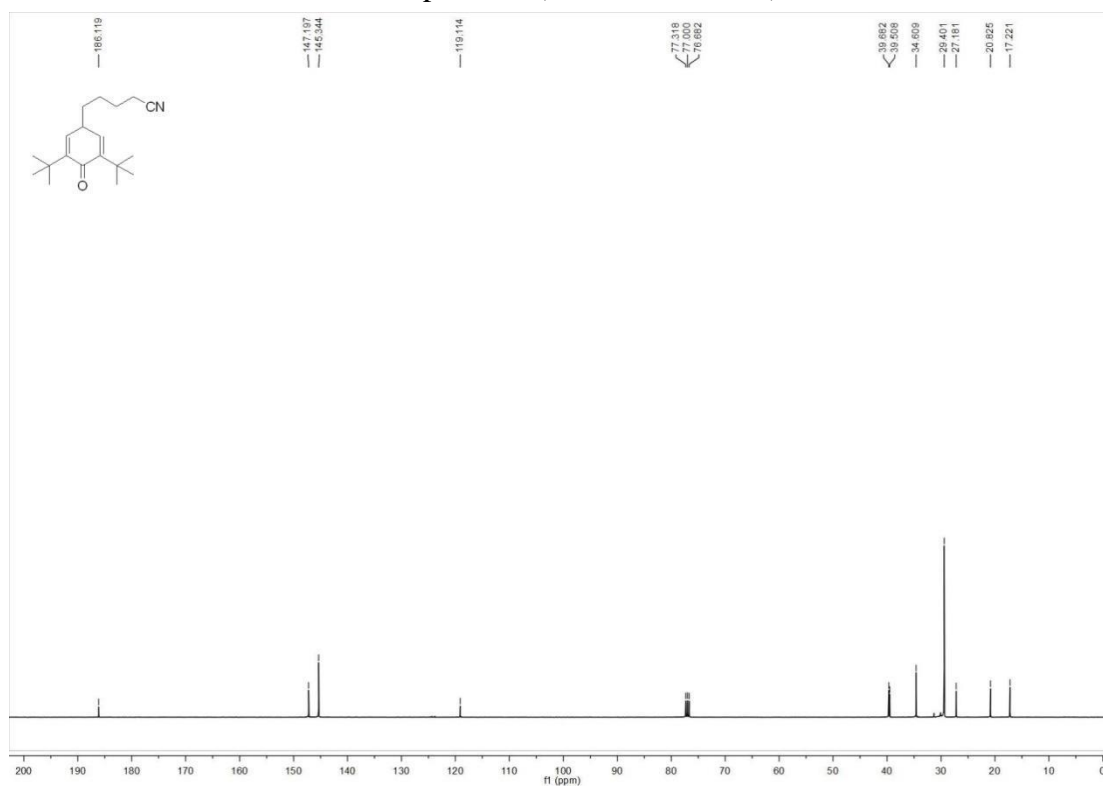

**6,6-Diphenylhex-5-enitrile (10a)**  
**<sup>1</sup>H NMR-spectrum (400 MHz, CDCl<sub>3</sub>) of 10a**

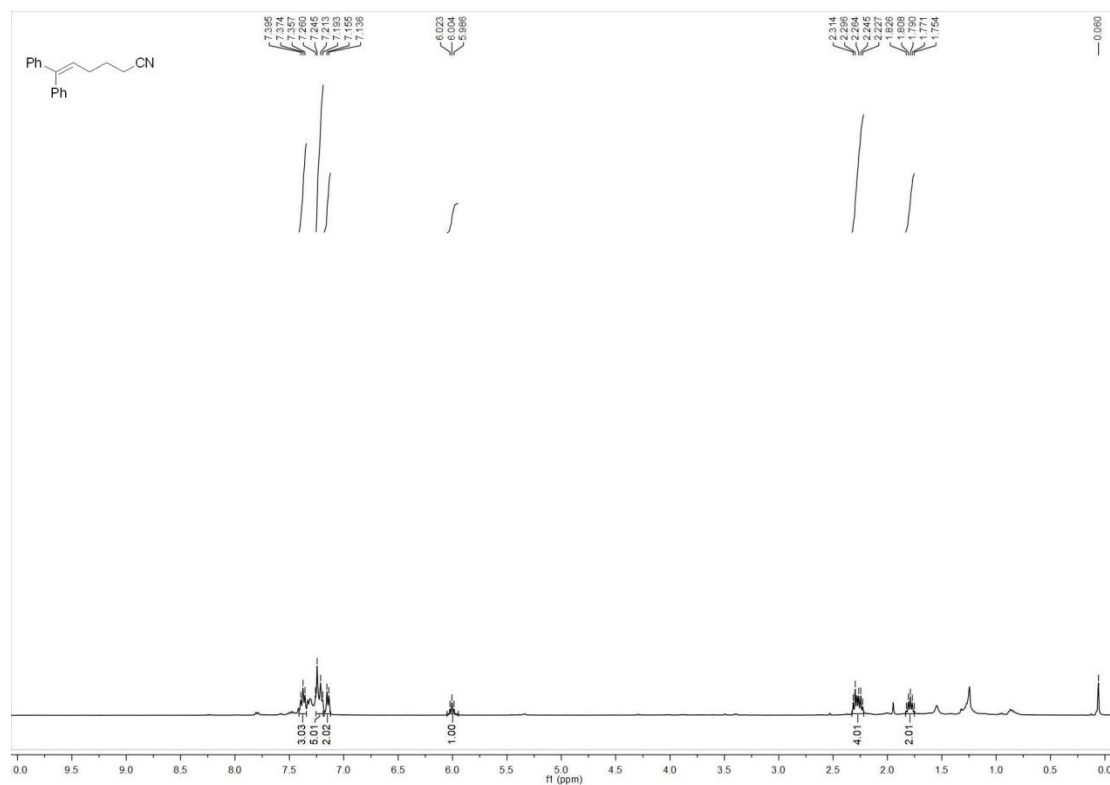

**<sup>13</sup>C NMR-spectrum (101 MHz, CDCl<sub>3</sub>) of 10a**

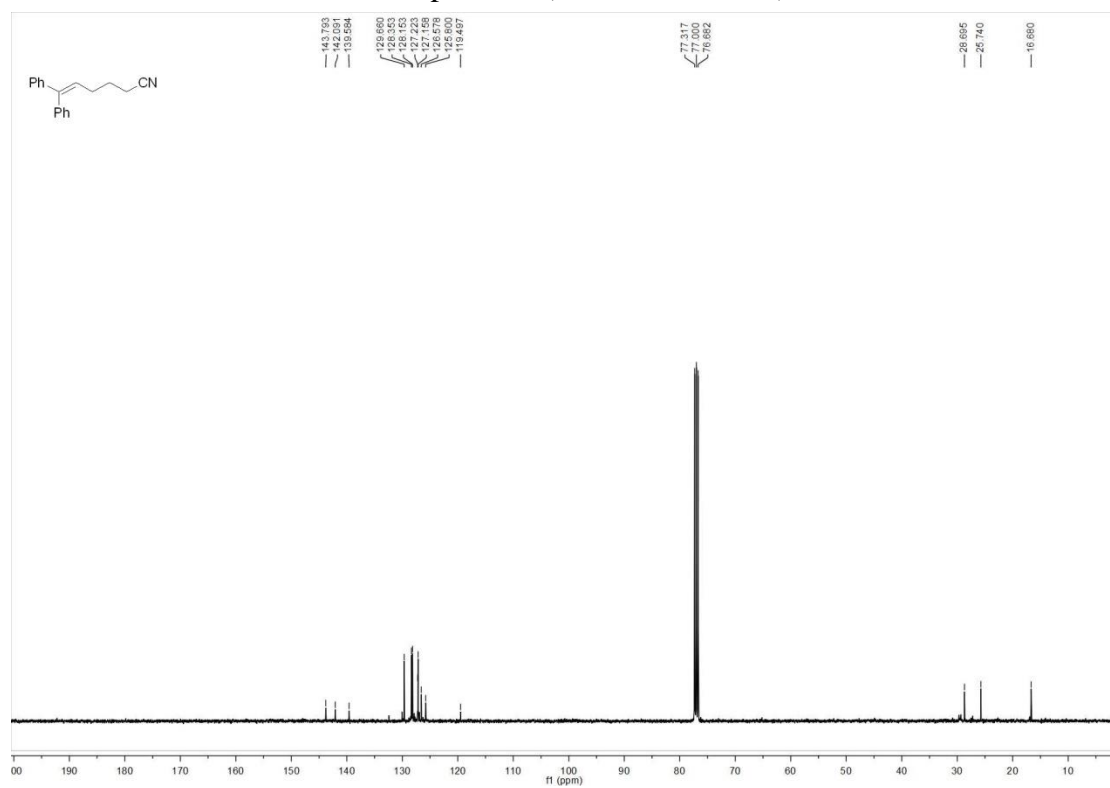

**4-((2,2-Diphenylvinyl)sulfonyl)butanenitrile (11a)**  
<sup>1</sup>H NMR-spectrum (400 MHz, CDCl<sub>3</sub>) of **11a**

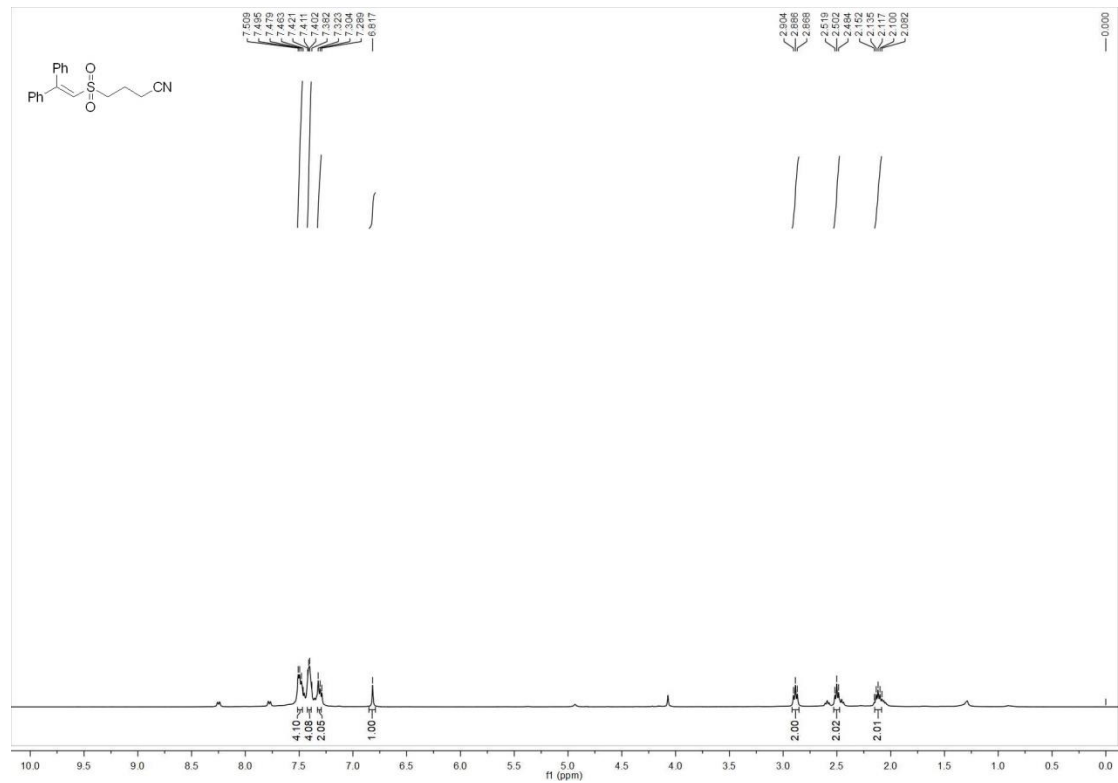

**<sup>13</sup>C NMR-spectrum (101 MHz, CDCl<sub>3</sub>) of **11a****

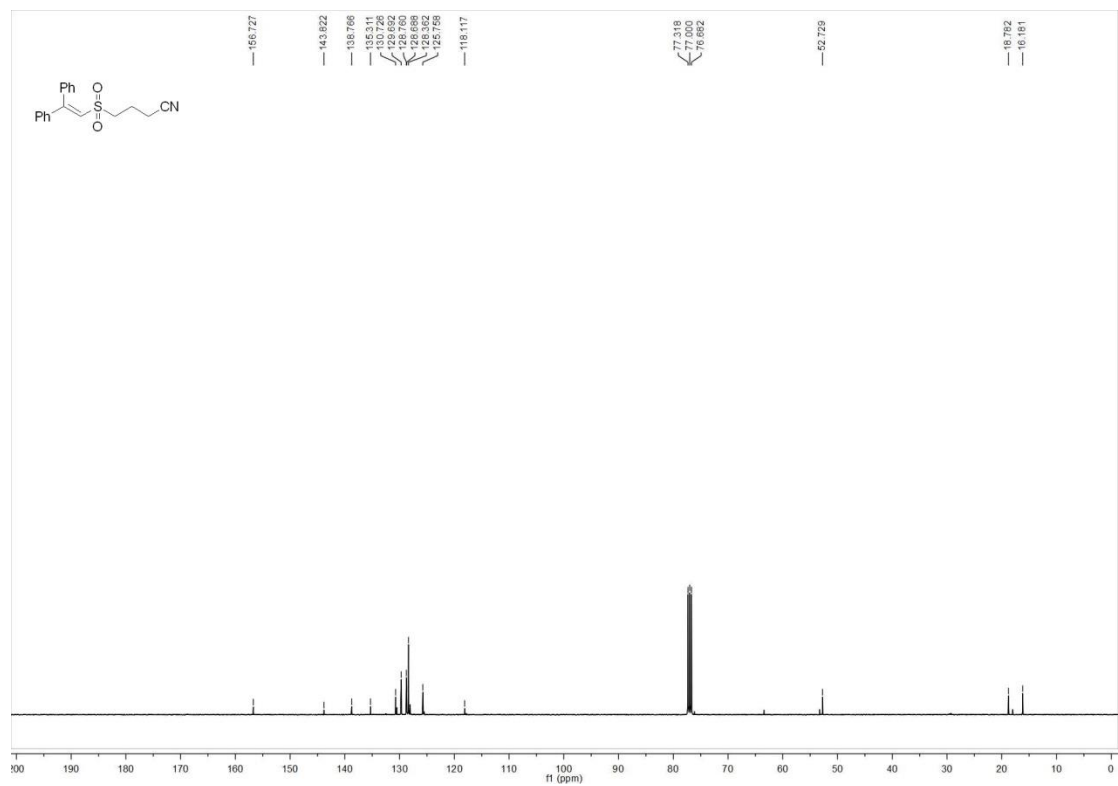

Supplement: d3qo00683b1.pdf [file d3qo00683b1.pdf]
